# Supplementary material for: Enhanced Selectivity in 4-Quinolone Formation: A Dual-Base System for Palladium-Catalyzed Carbonylative Cyclization with Fe(CO)5
Source: MDPI journal article supplement (doi:10.3390/molecules29040850), 2024-02-14

---

## Supplementary Materials

### Enhanced Selectivity in 4-Quinolone Formation: A Dual-Base System for Palladium-Catalyzed Carbonylative Cyclization with $\text{Fe}(\text{CO})_5$

Meng Guo, Dou Wu, Hongyu Yang, Xiao Zhang, Dong-Xu Xue\*, and Weiqiang Zhang\*

E-mail: [xuedx@snnu.edu.cn](mailto:xuedx@snnu.edu.cn) and [zwq@snnu.edu.cn](mailto:zwq@snnu.edu.cn)

#### Contents

|                                                           |    |
|-----------------------------------------------------------|----|
| 1. Real-time monitoring of carbon monoxide pressure.....  | 1  |
| 2. $^1\text{H}$ NMR and $^{13}\text{C}$ NMR Spectra ..... | 2  |
| 3. HRMS Spectra .....                                     | 24 |

---

## 1. Real-time monitoring of carbon monoxide pressure

The Sonogashira carbonylative annulation of 2-iodoaniline, phenylacetylene, and  $\text{Fe}(\text{CO})_5$  was used as the model reaction. Under the identified reaction conditions (**Table 1**, entry 12), we observed pressure changes in the reaction vial (**Figure 1**). All reagents were added to a 31 mL vial at room temperature, then a stirrer was added and the vial was sealed with a rubber stopper. The differential pressure gauge was connected and the needle hole was sealed with hot melt adhesive. After preparation, the reaction vial was immediately placed on a stirring table heated to  $60^\circ\text{C}$  and the speed was adjusted to 400 rpm. Pressure changes were recorded continuously for 4 hours, and the results are shown in **Figure 1**.

## 2. $^1\text{H}$ NMR and $^{13}\text{C}$ NMR Spectra

### 2-phenylquinolin-4(1H)-one (4a) $^1\text{H}$ NMR

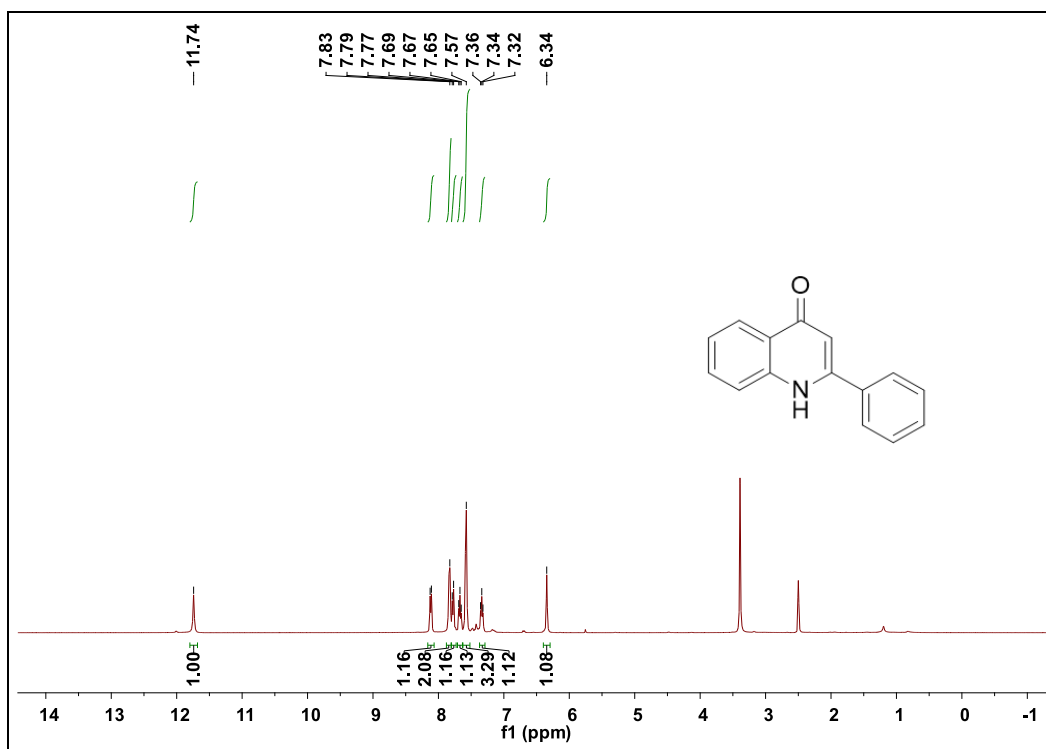

### 2-phenylquinolin-4(1H)-one (4a) $^{13}\text{C}$ NMR

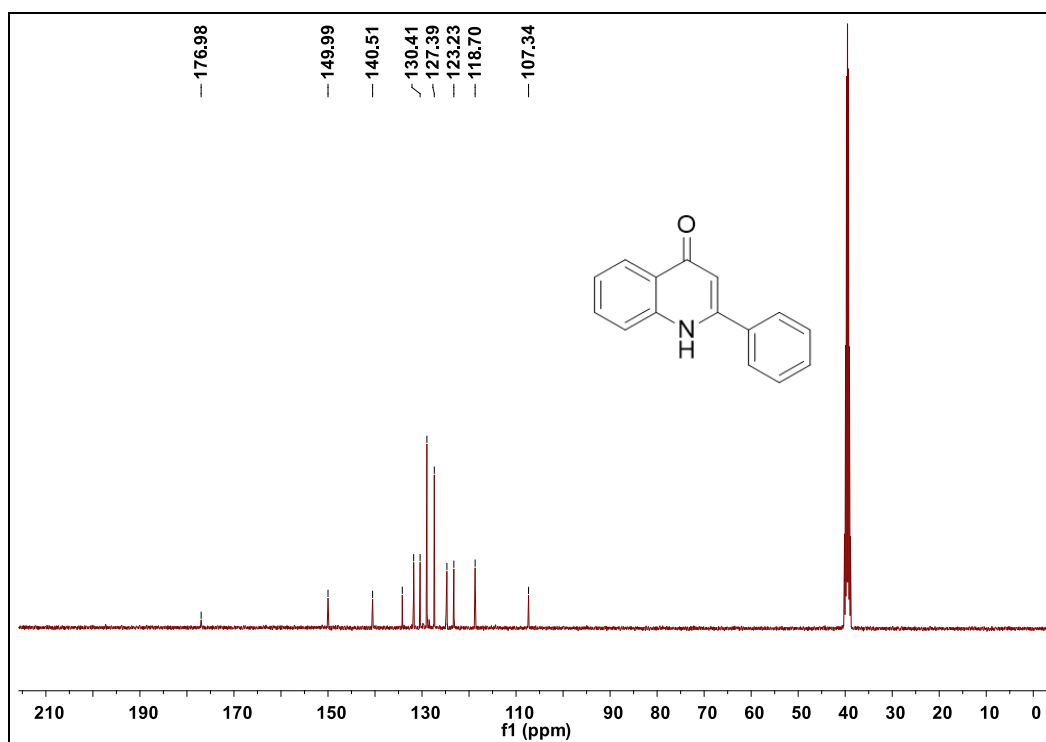

2-(m-methoxyphenyl) quinolin-4(1H)-one (4b)  $^1\text{H}$  NMR

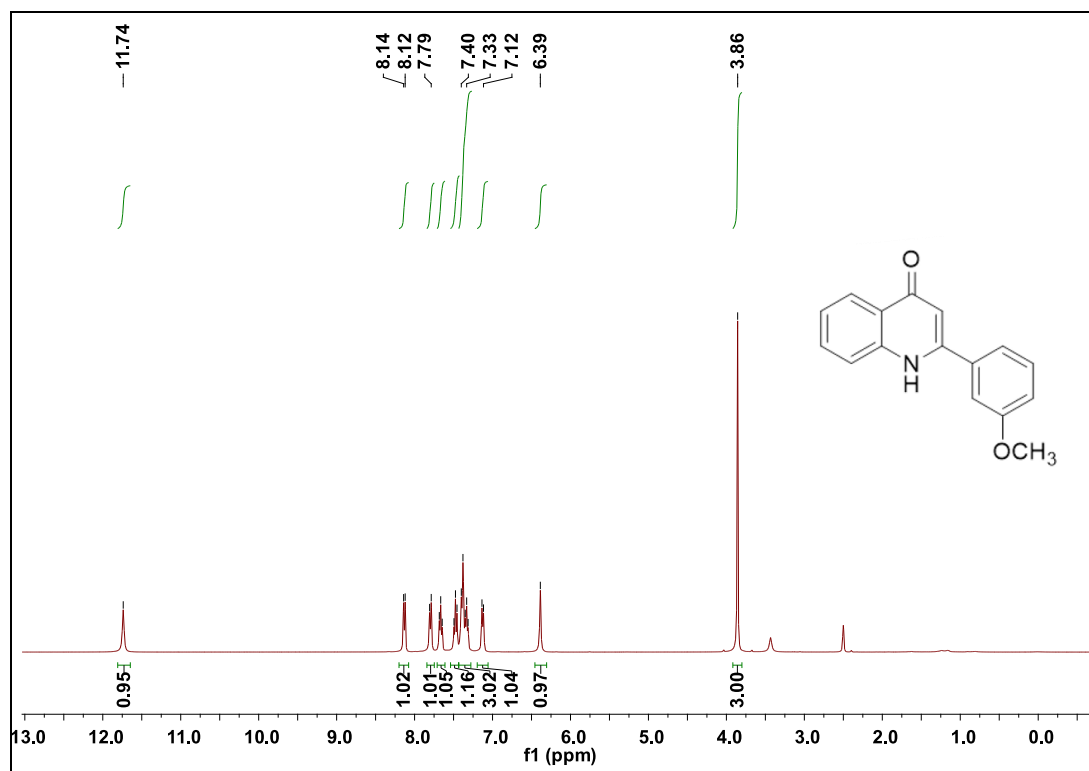

2-(m-methoxyphenyl) quinolin-4(1H)-one (4b)  $^{13}\text{C}$  NMR

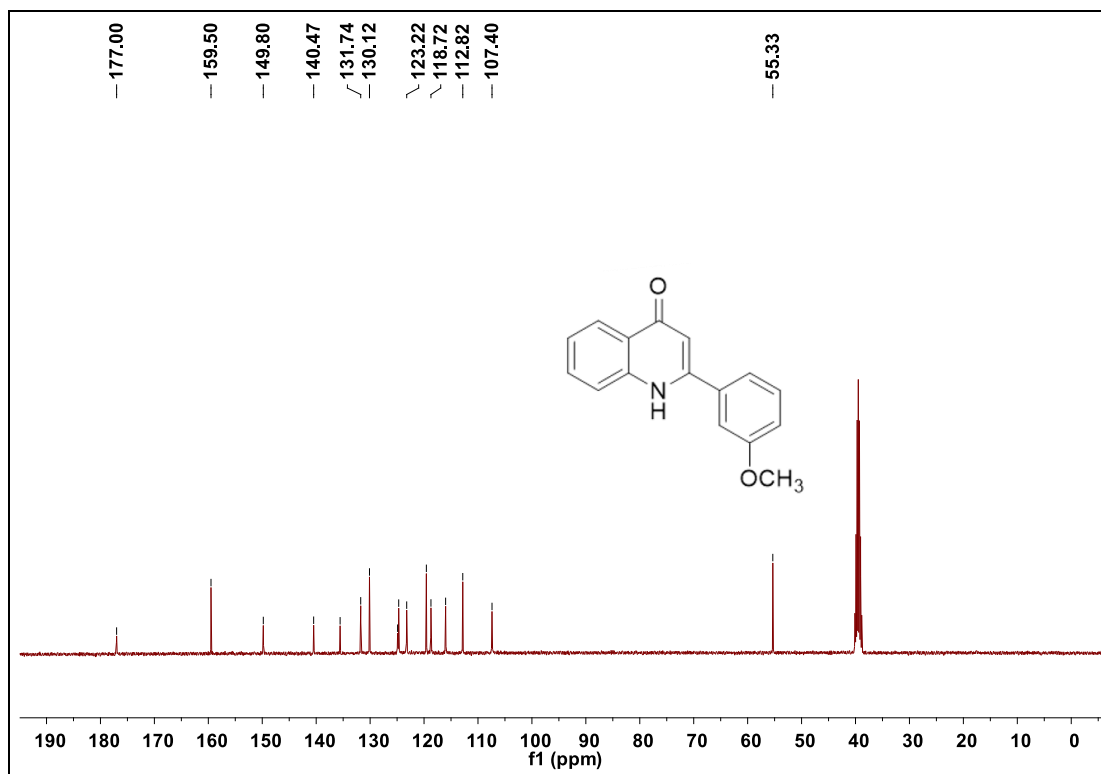

2-(p-methoxyphenyl) quinolin-4(1H)-one (4c)  $^1\text{H}$  NMR

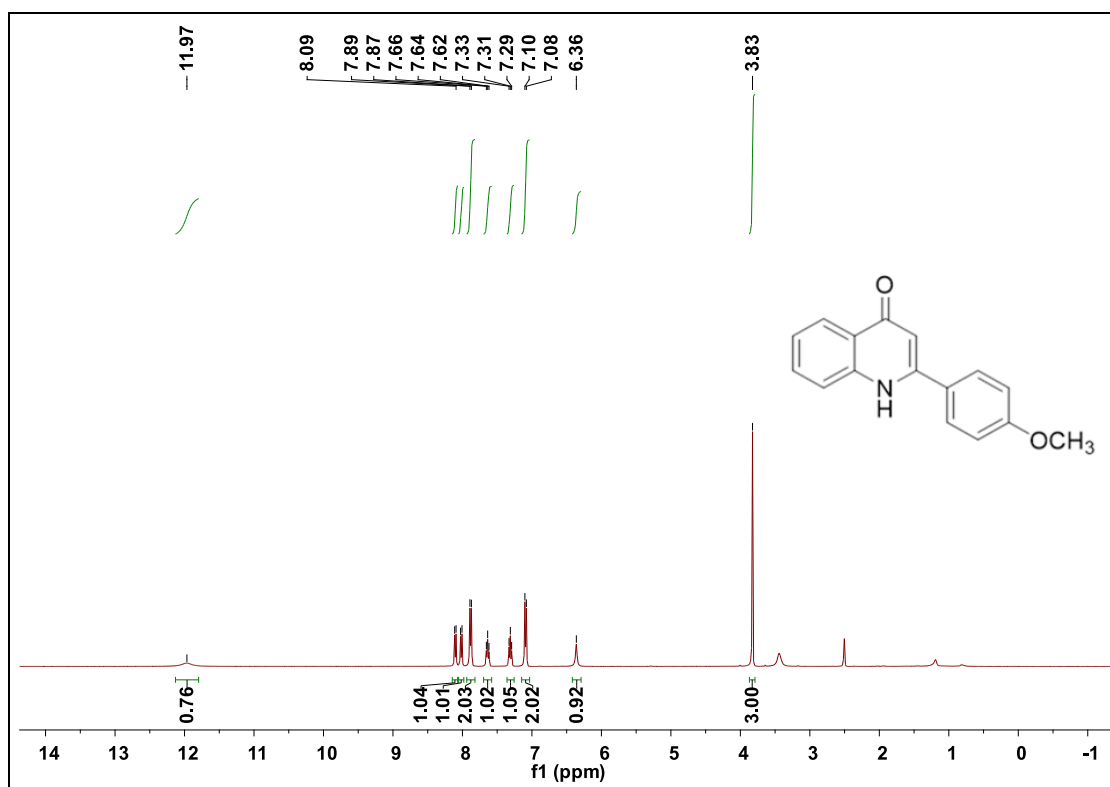

2-(p-methoxyphenyl) quinolin-4(1H)-one (4c)  $^{13}\text{C}$  NMR

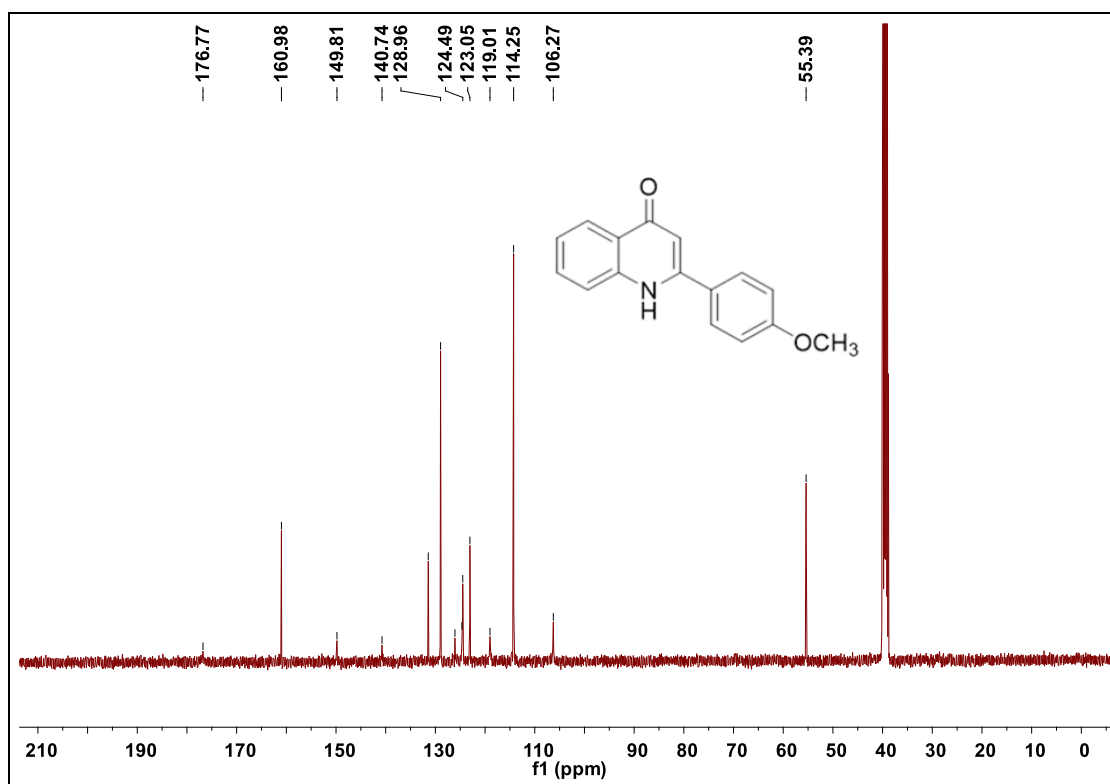

2-(m-tolyl) quinolin-4(1H)-one (4d)  $^1\text{H}$  NMR

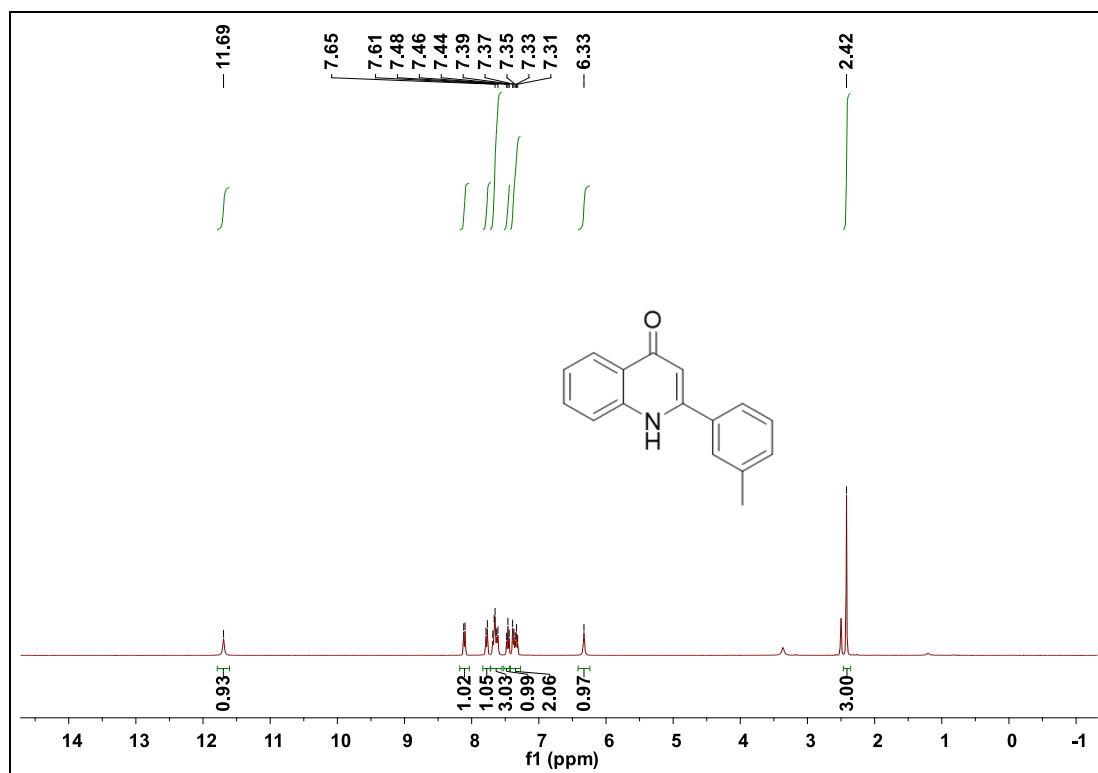

2-(m-tolyl) quinolin-4(1H)-one (4d)  $^{13}\text{C}$  NMR

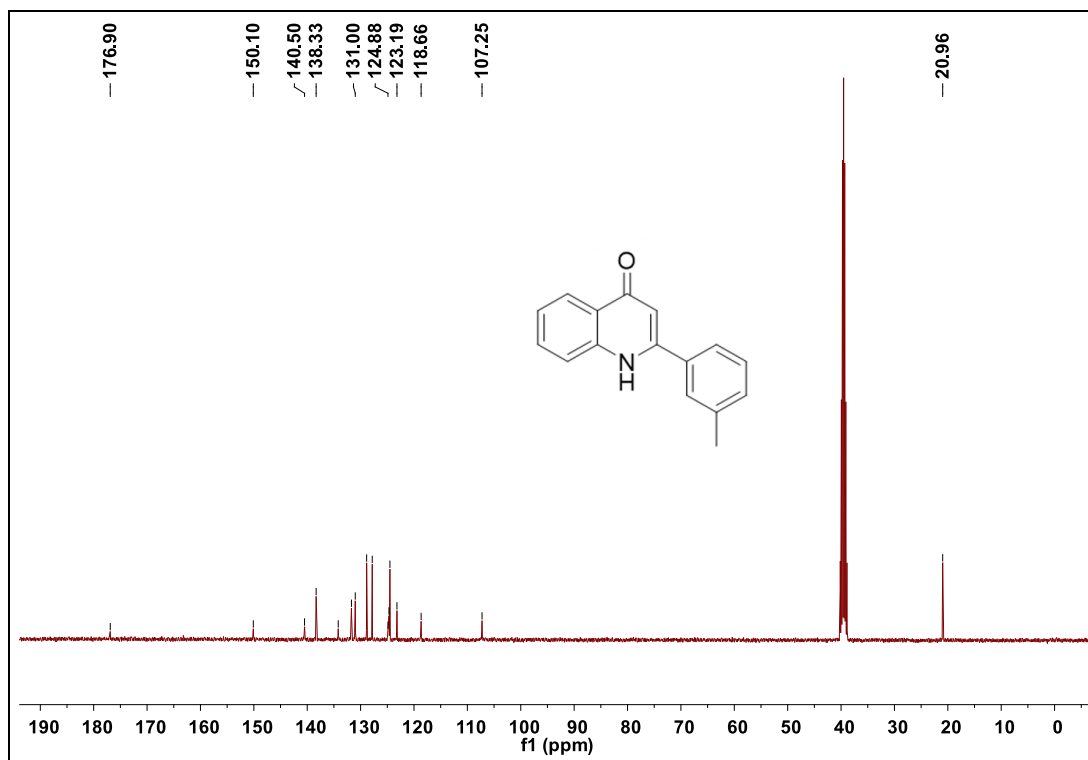

2-(p-tolyl) quinolin-4(1H)-one (4e)  $^1\text{H}$  NMR

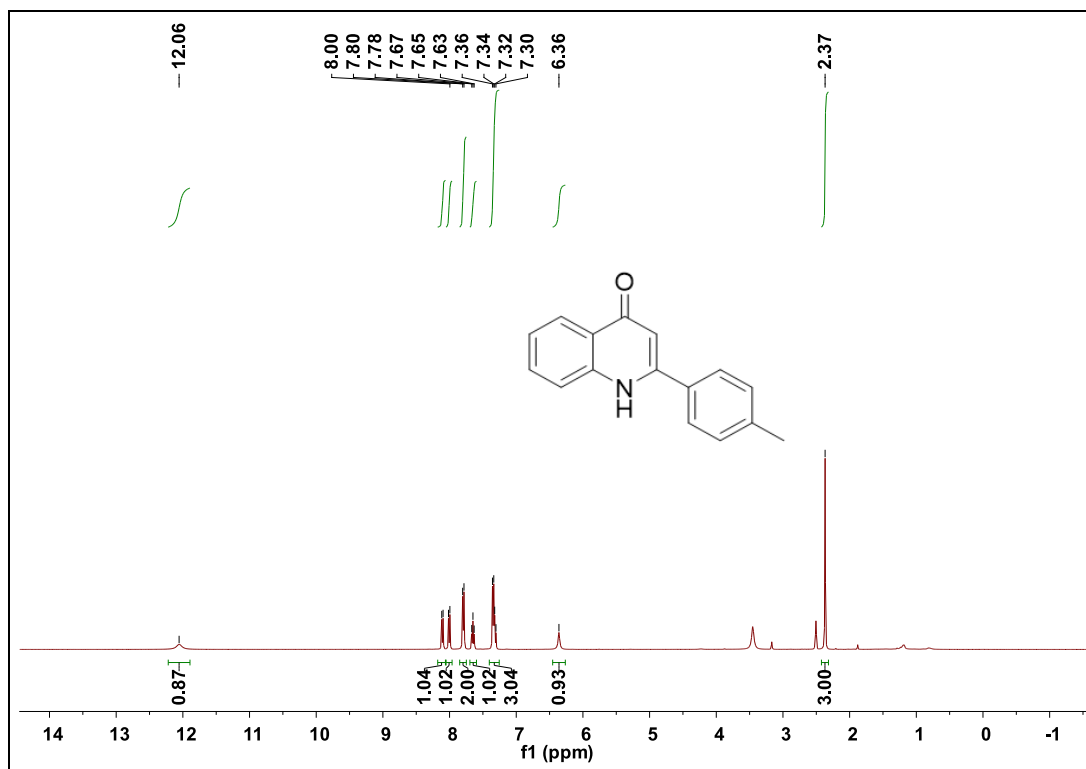

2-(p-tolyl) quinolin-4(1H)-one (4e)  $^{13}\text{C}$  NMR

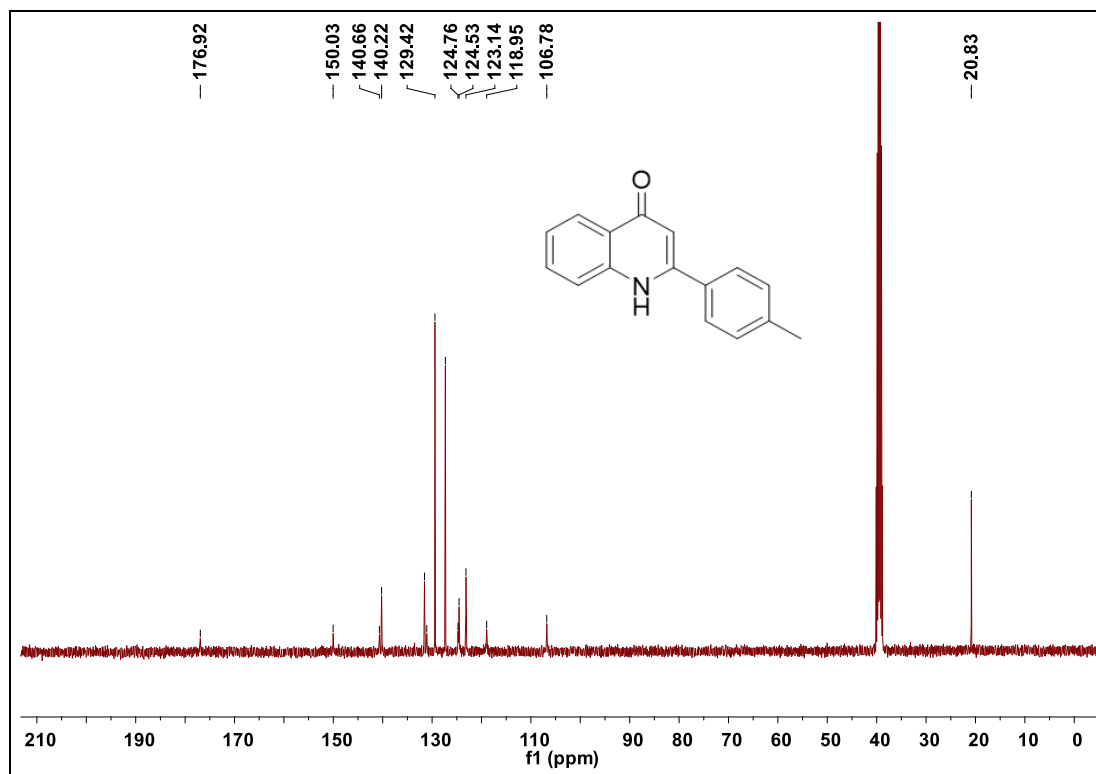

2-(4-butylphenyl) quinolin-4(1H)-one (4f)  $^1\text{H}$  NMR

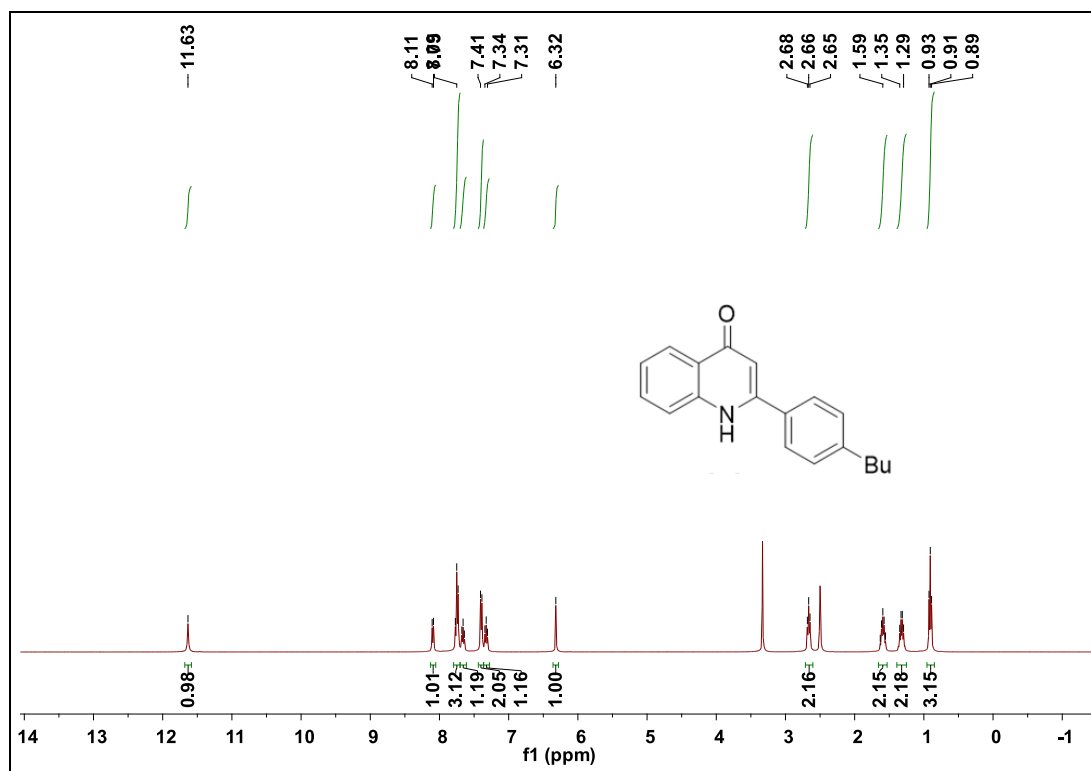

2-(4-butylphenyl) quinolin-4(1H)-one (4f)  $^{13}\text{C}$  NMR

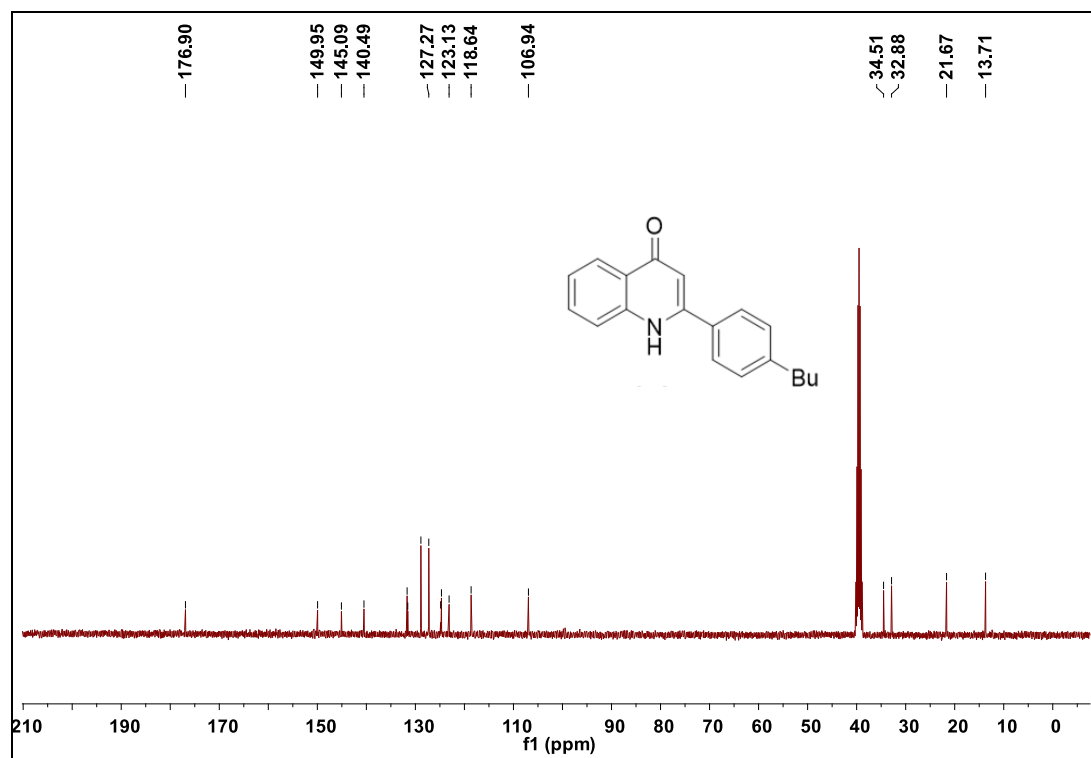



2-(2-chlorophenyl) quinolin-4(1H)-one (4g)  $^1\text{H}$  NMR

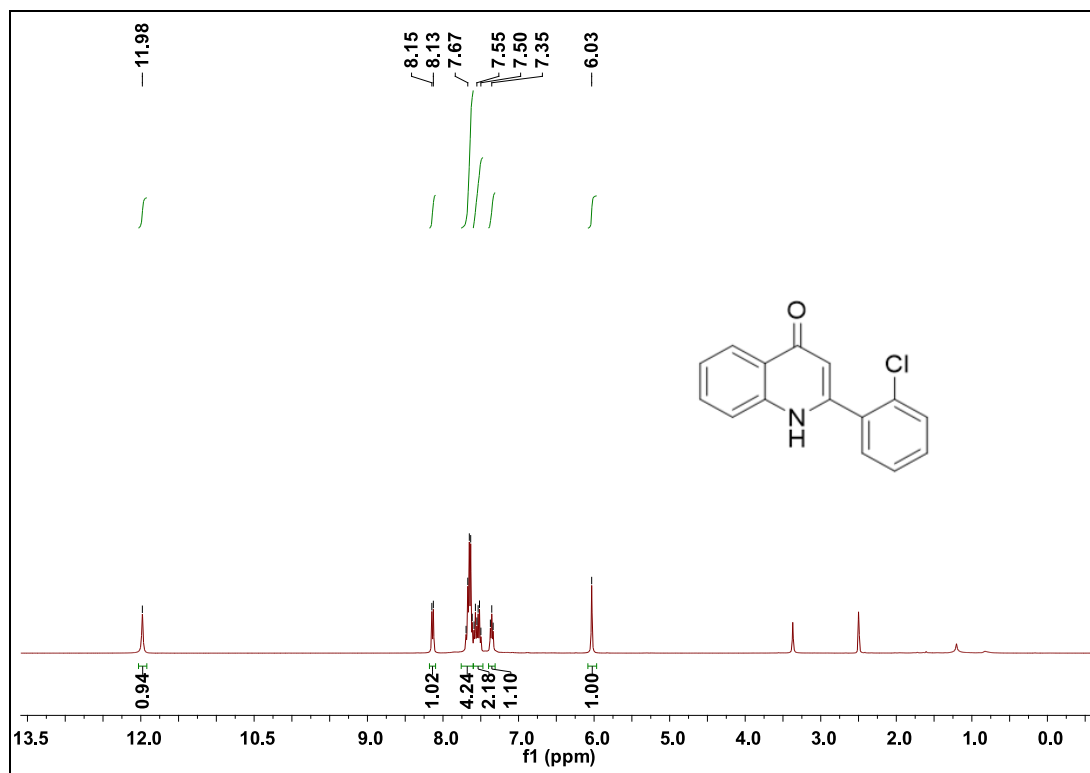

2-(2-chlorophenyl) quinolin-4(1H)-one (4g)  $^{13}\text{C}$  NMR

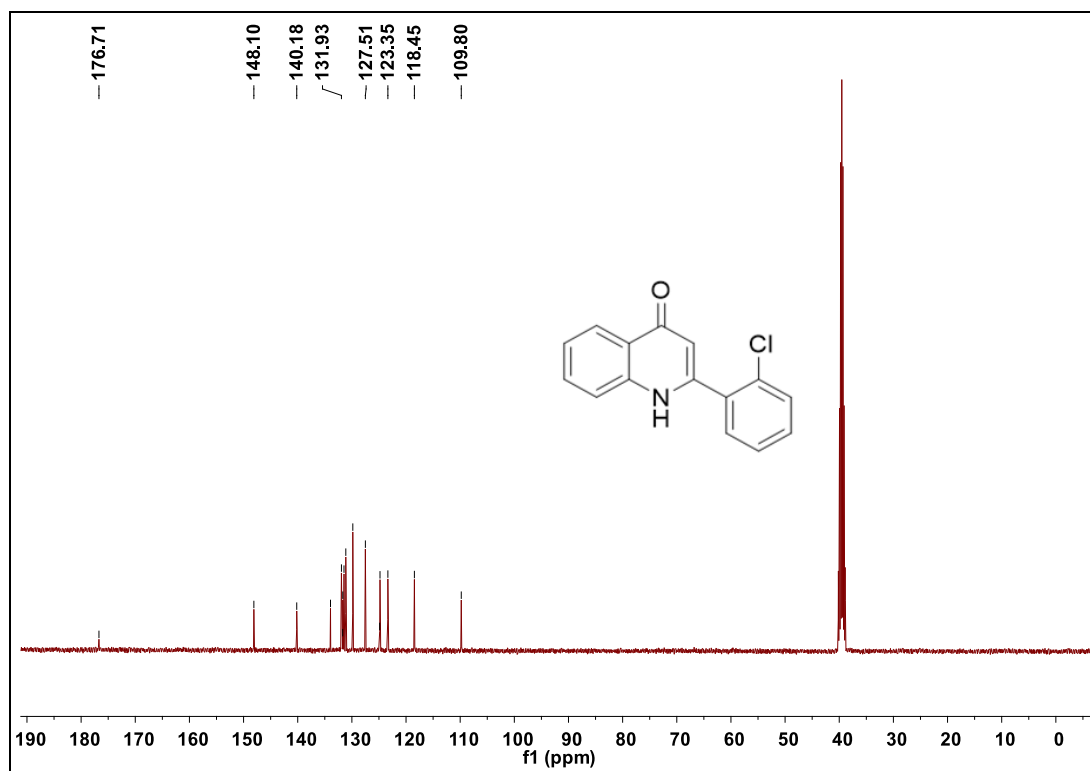

2-(thiophen-2-yl) quinolin-4(1H)-one (4h)  $^1\text{H}$  NMR

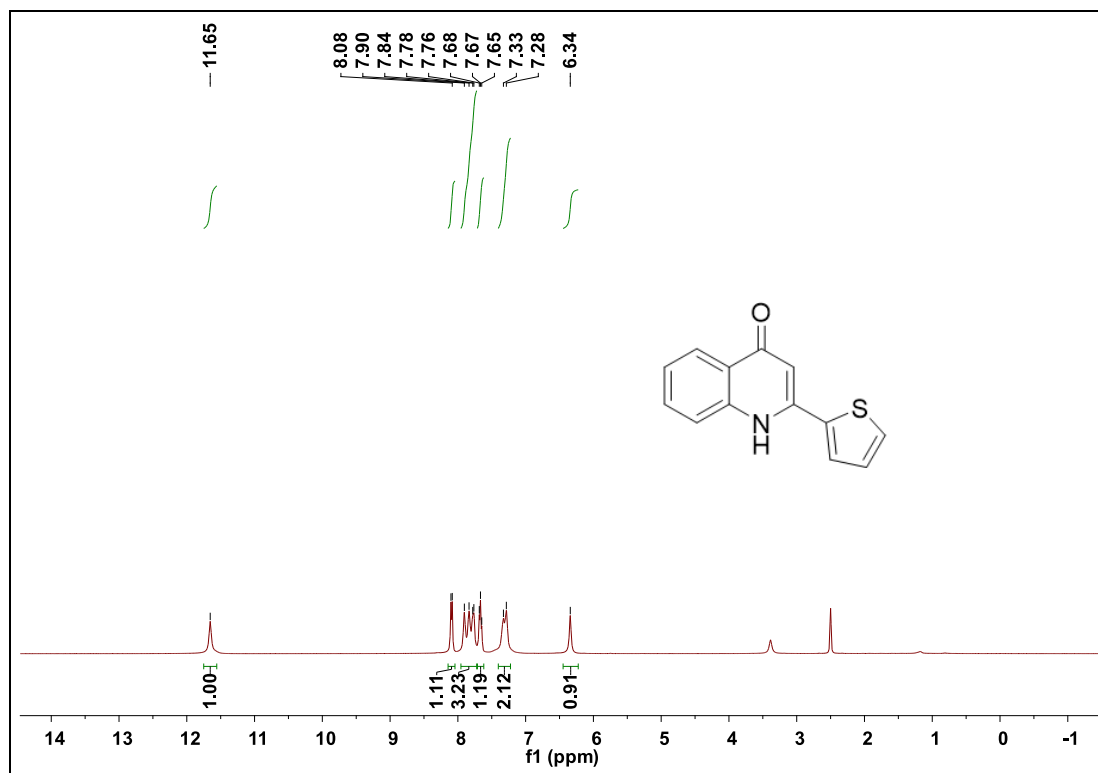

2-(thiophen-2-yl) quinolin-4(1H)-one (4h)  $^{13}\text{C}$  NMR

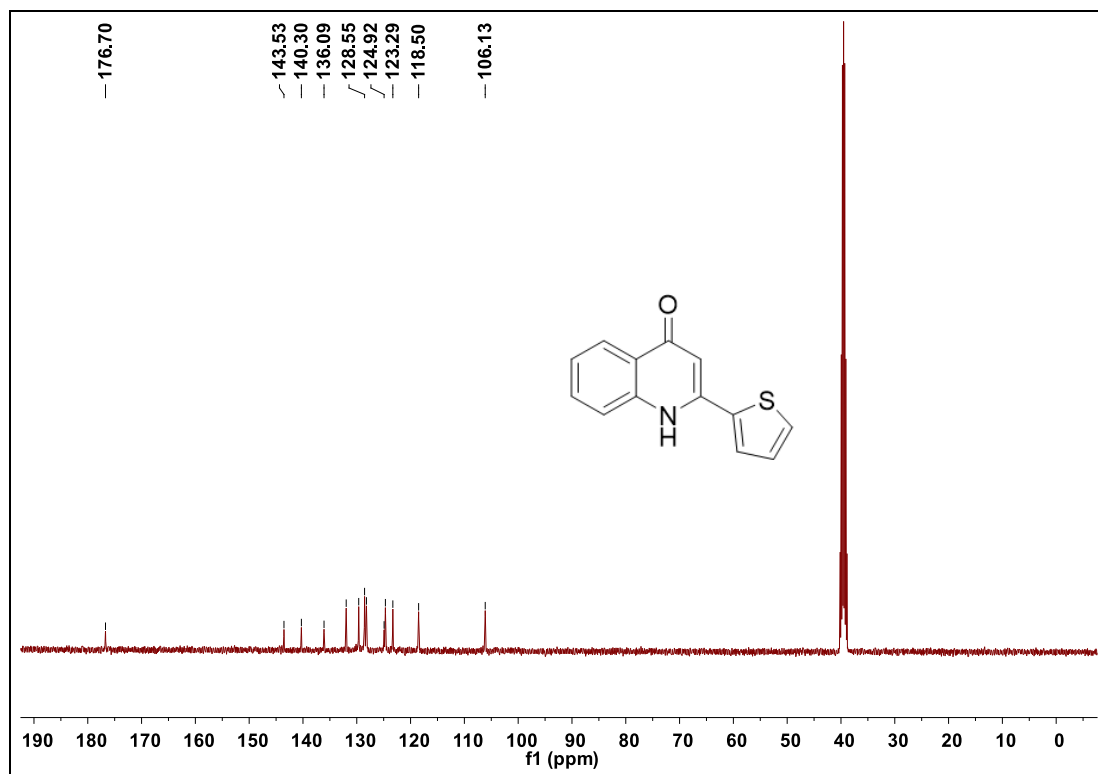

**2-(pyridin-3-yl)quinolin-4(1H)-one (4i)  $^1\text{H}$  NMR**

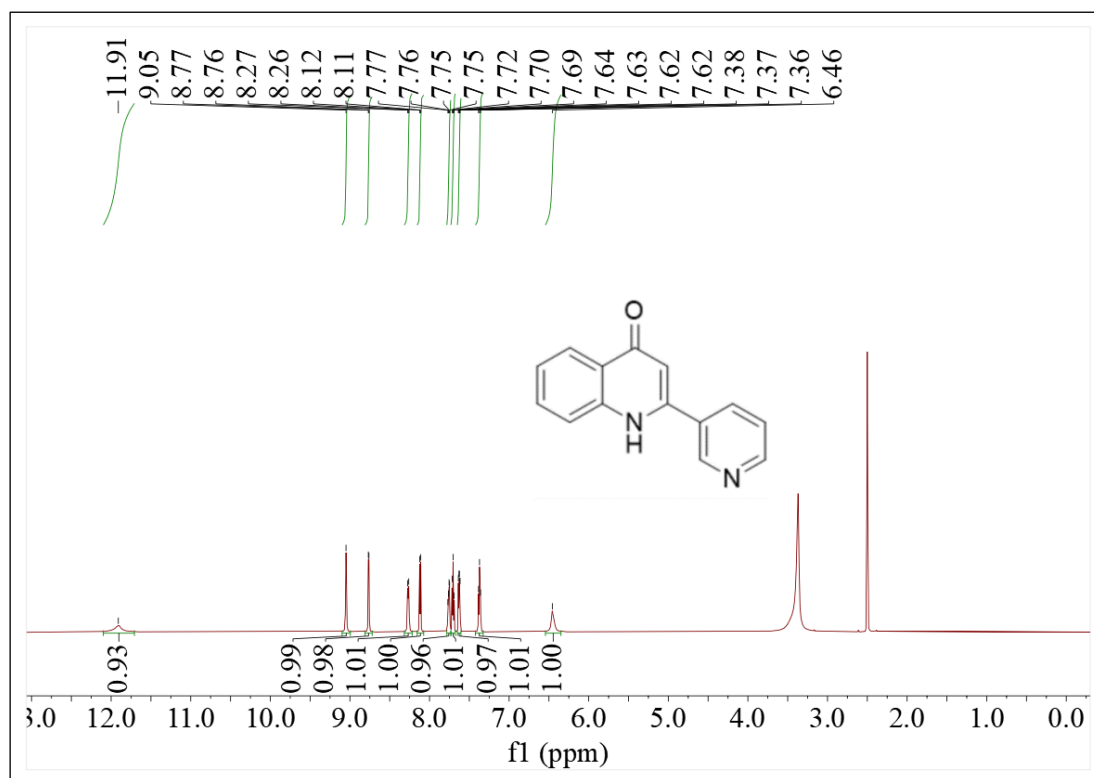

**2-(pyridin-3-yl)quinolin-4(1H)-one (4i)  $^{13}\text{C}$  NMR**

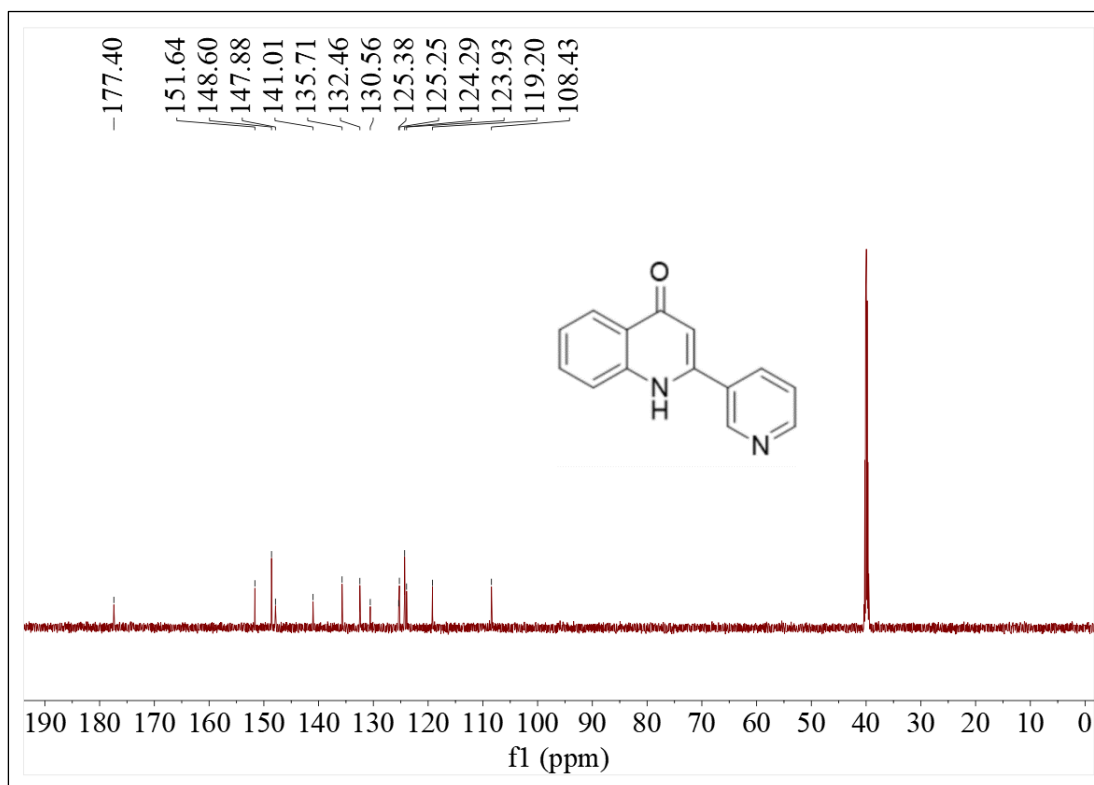

## 2-hexylquinolin-4(1H)-one (4j) $^1\text{H}$ NMR

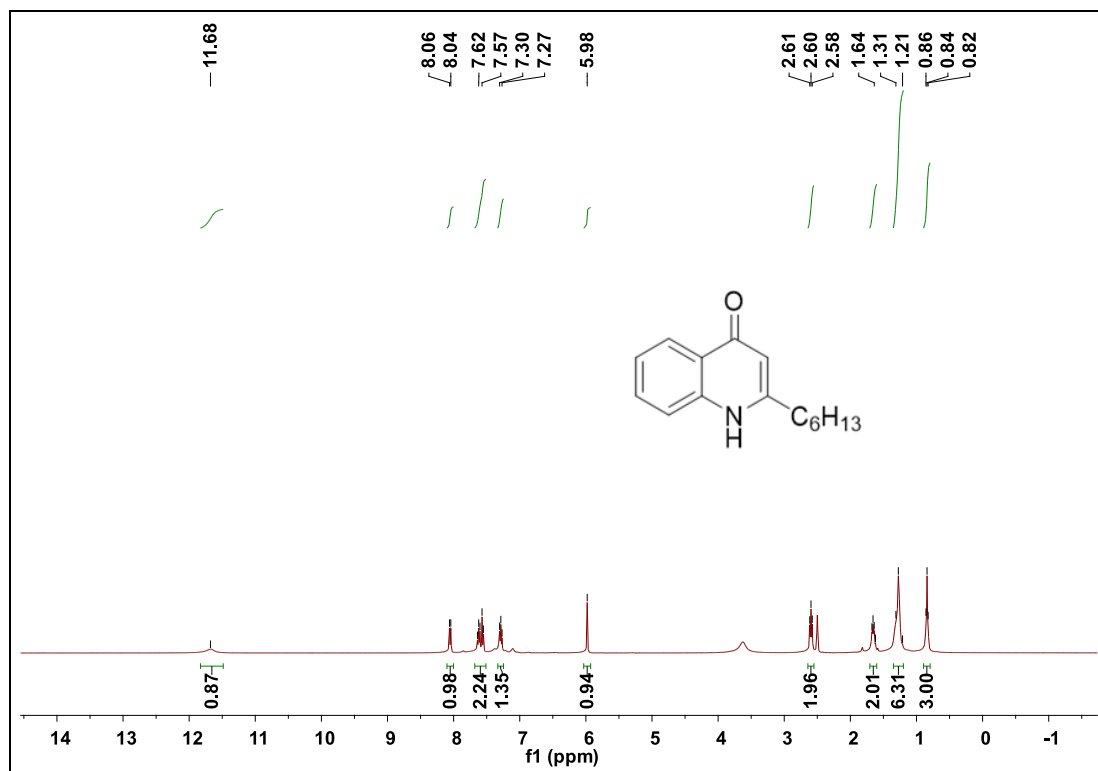

## 2-hexylquinolin-4(1H)-one (4j) $^{13}\text{C}$ NMR

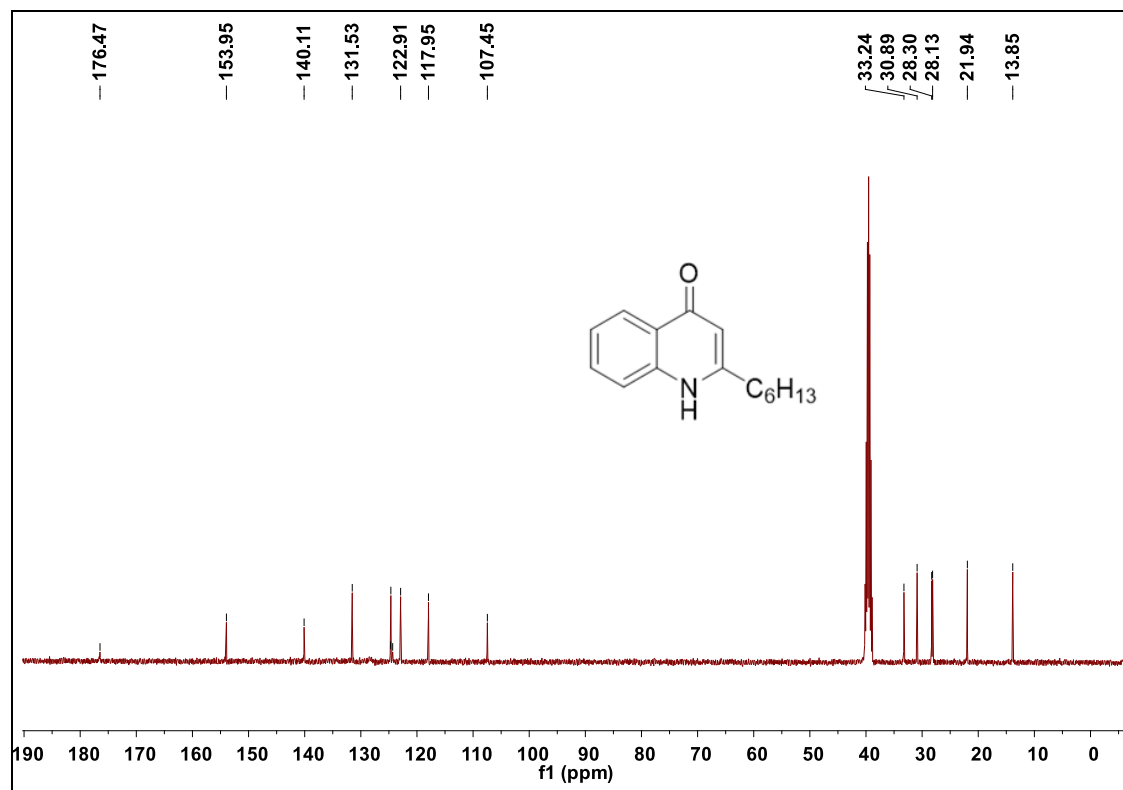

**2-heptylquinolin-4(1H)-one (4k)  $^1\text{H}$  NMR**

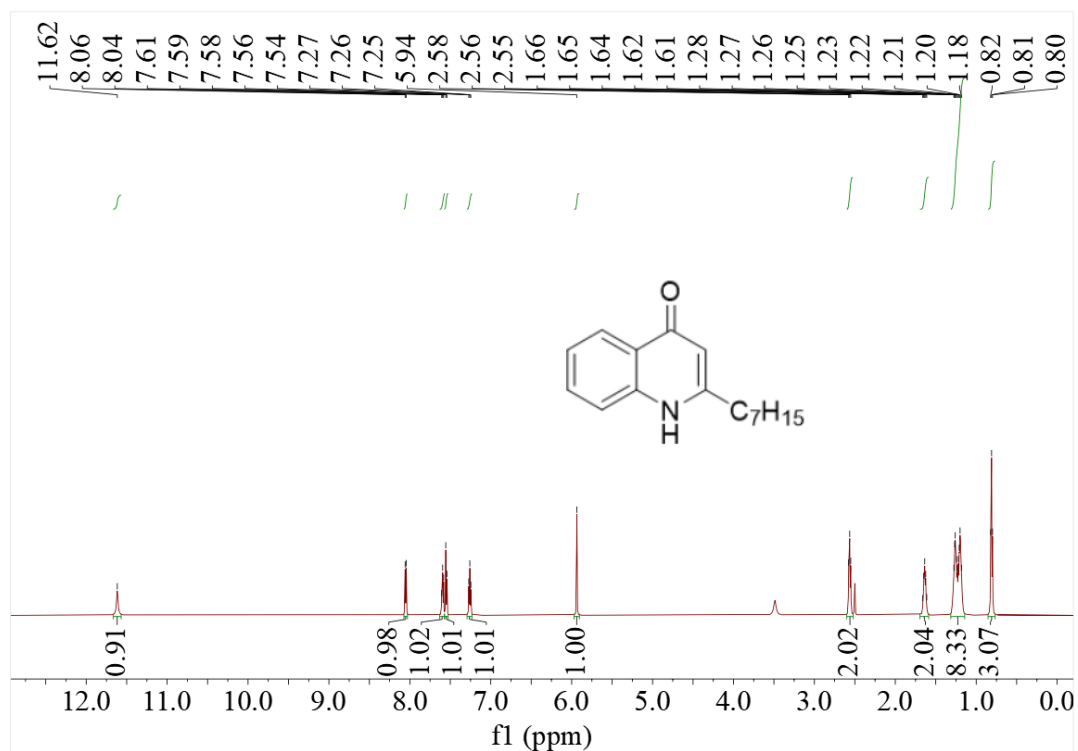

**2-heptylquinolin-4(1H)-one (4k)  $^{13}\text{C}$  NMR**

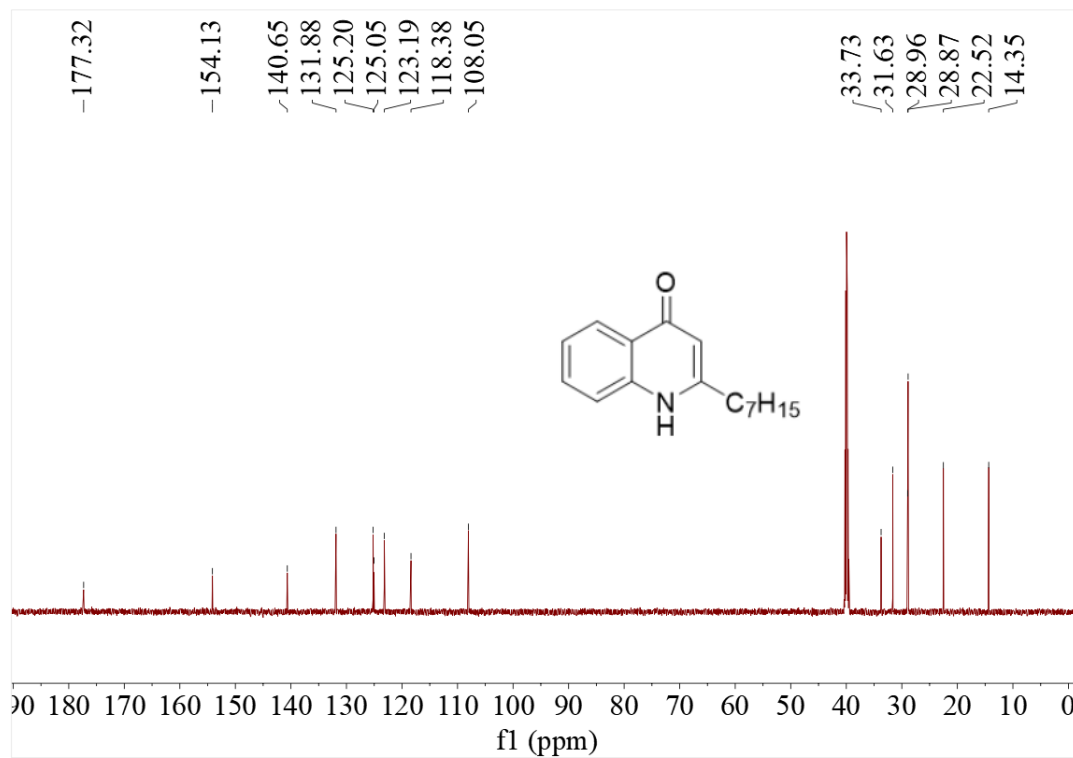

6-chloro-2-phenylquinolin-4(1H)-one (4l)  $^1\text{H}$  NMR

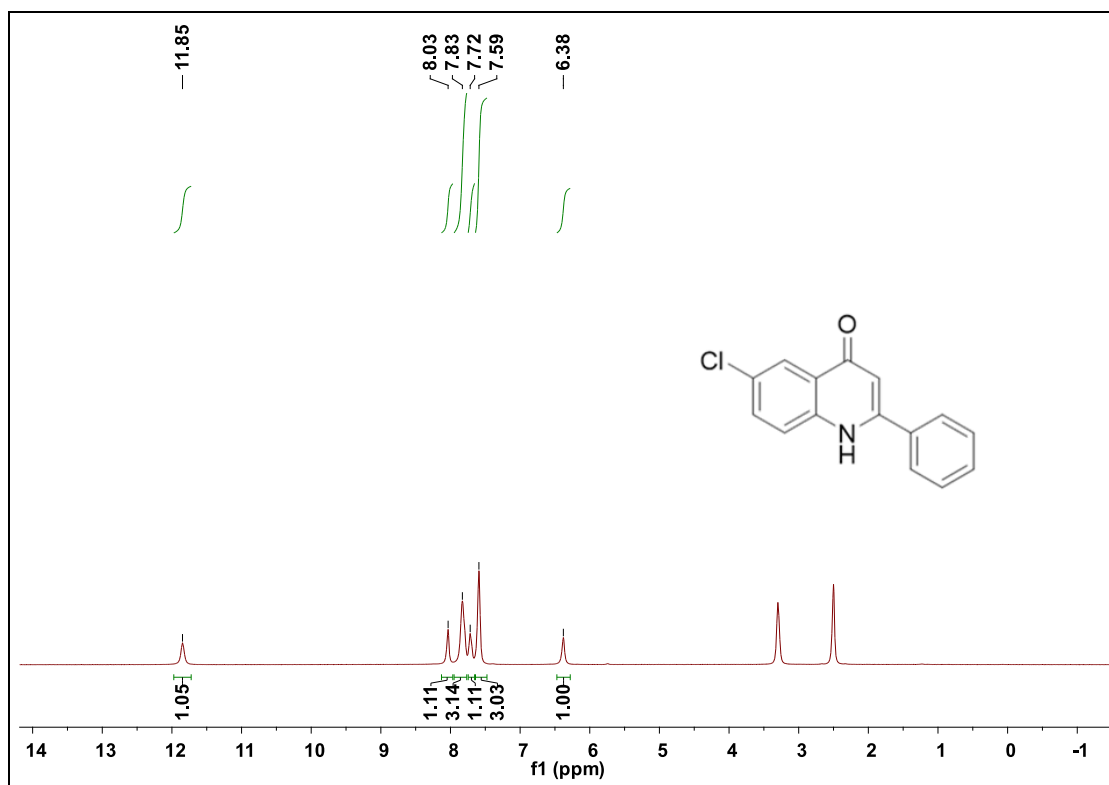

6-chloro-2-phenylquinolin-4(1H)-one (4l)  $^{13}\text{C}$  NMR

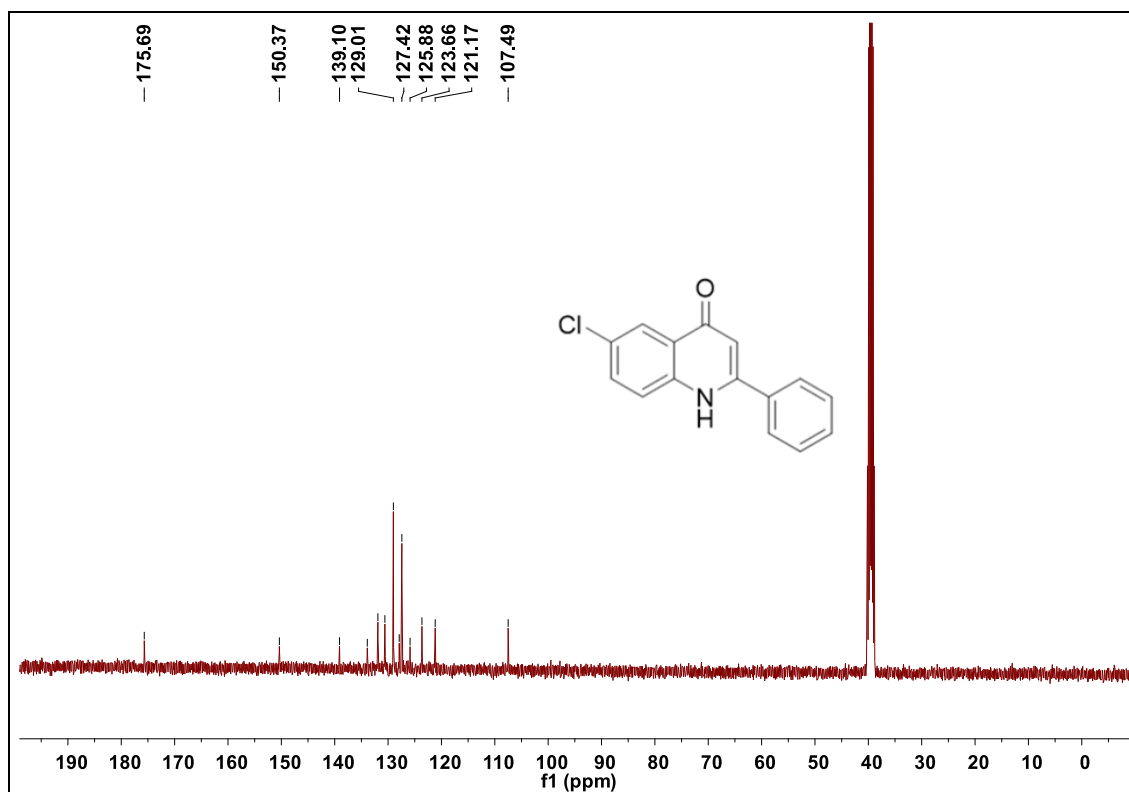

6-chloro-2-(4-methoxyphenyl) quinolin-4(1H)-one (4m)  $^1\text{H}$  NMR

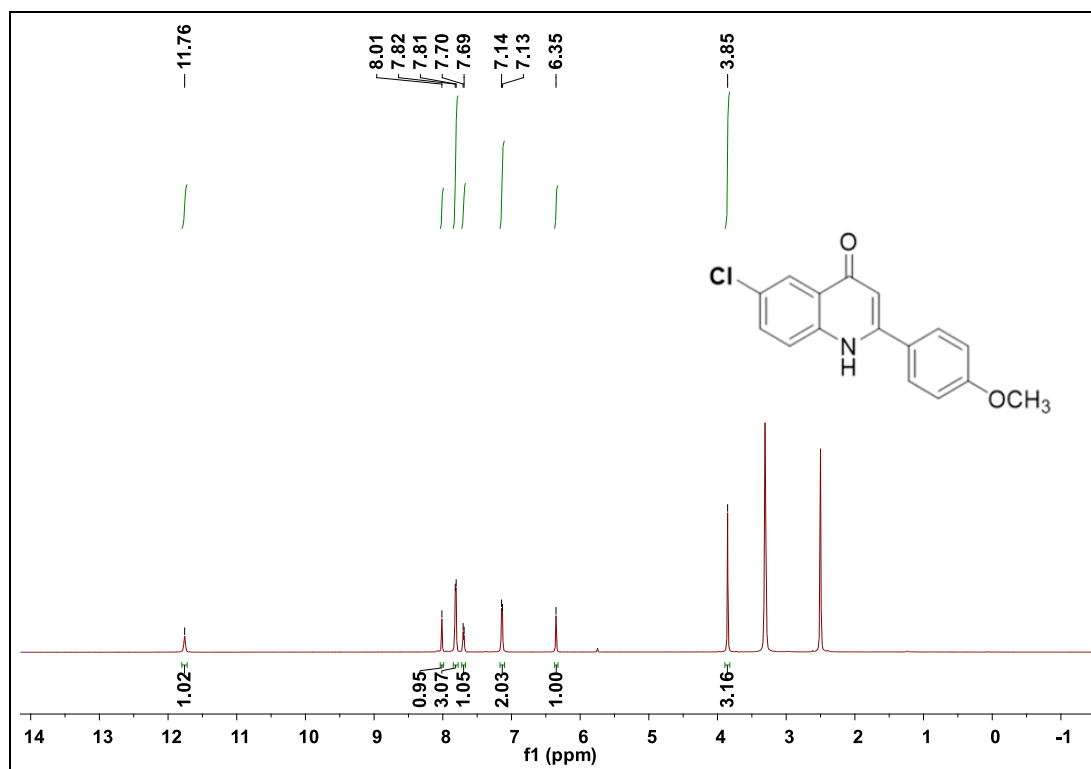

6-chloro-2-(4-methoxyphenyl) quinolin-4(1H)-one (4m)  $^{13}\text{C}$  NMR

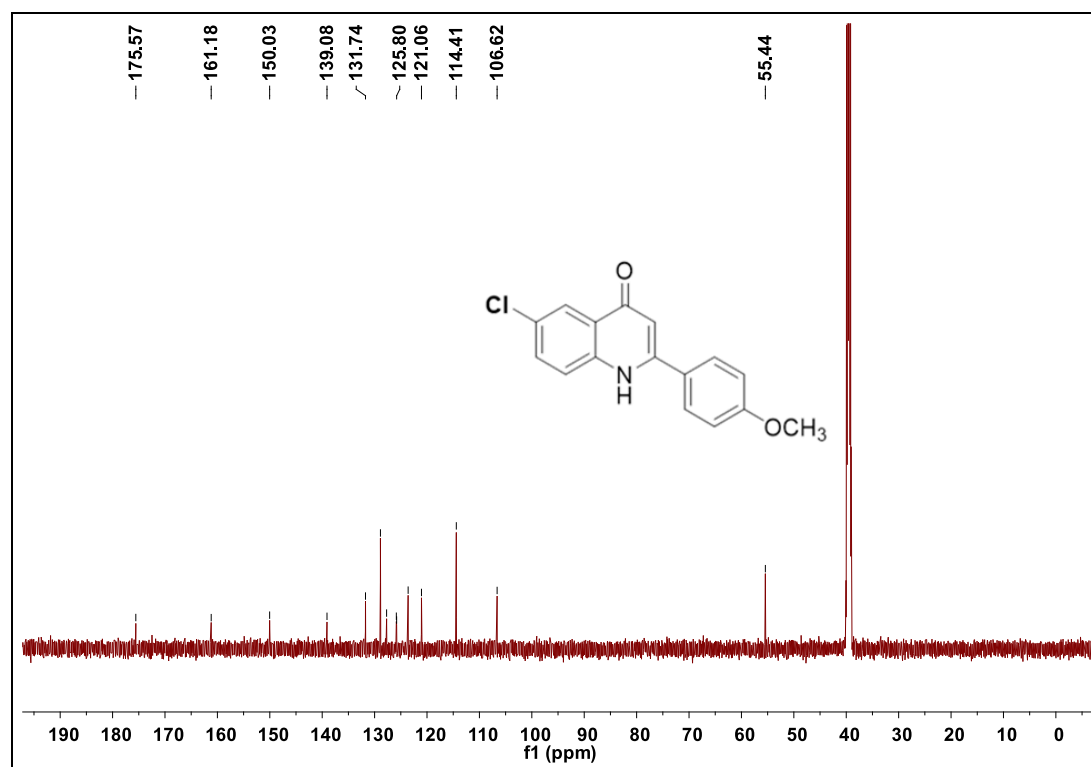

6-chloro-2-(p-tolyl) quinolin-4(1H)-one (4n)  $^1\text{H}$  NMR

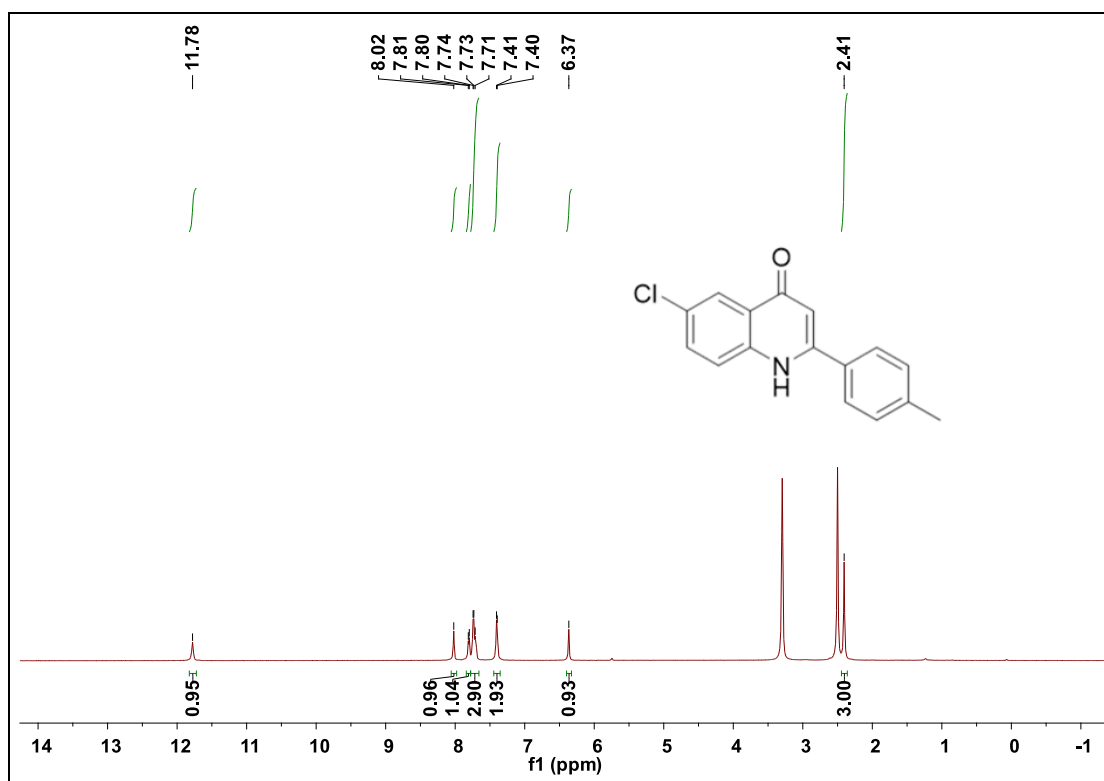

6-chloro-2-(p-tolyl) quinolin-4(1H)-one (4n)  $^{13}\text{C}$  NMR

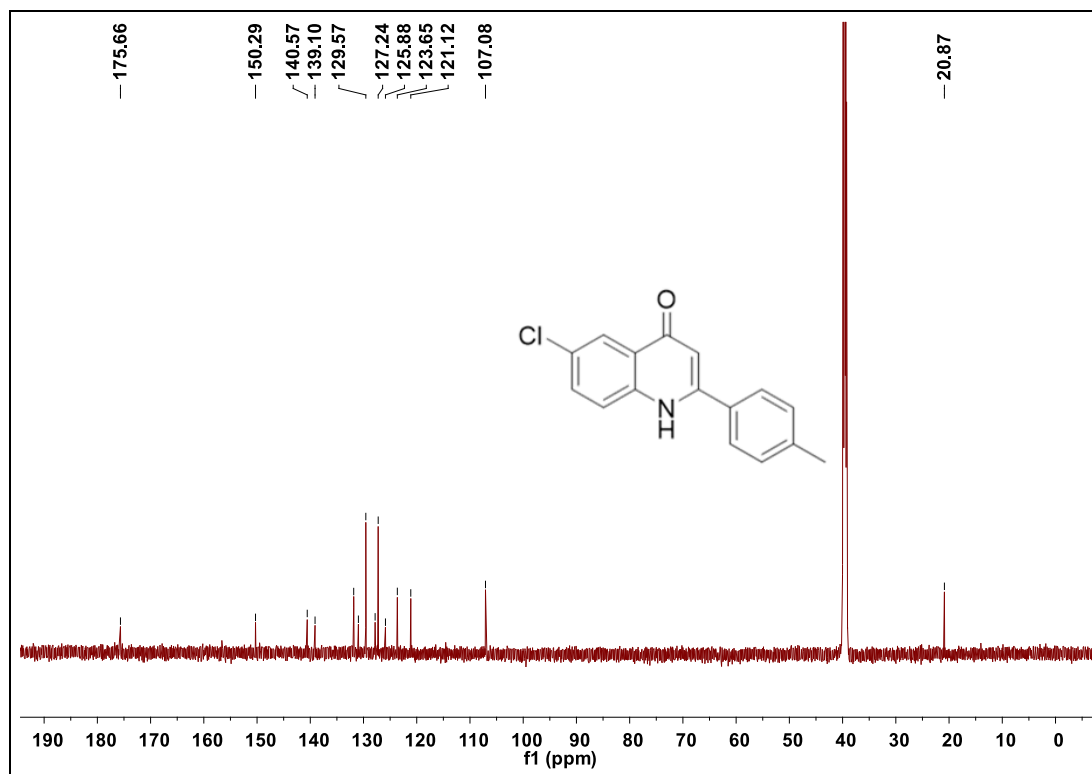



7-methyl-2-phenylquinolin-4(1H)-one (4o)  $^1\text{H}$  NMR

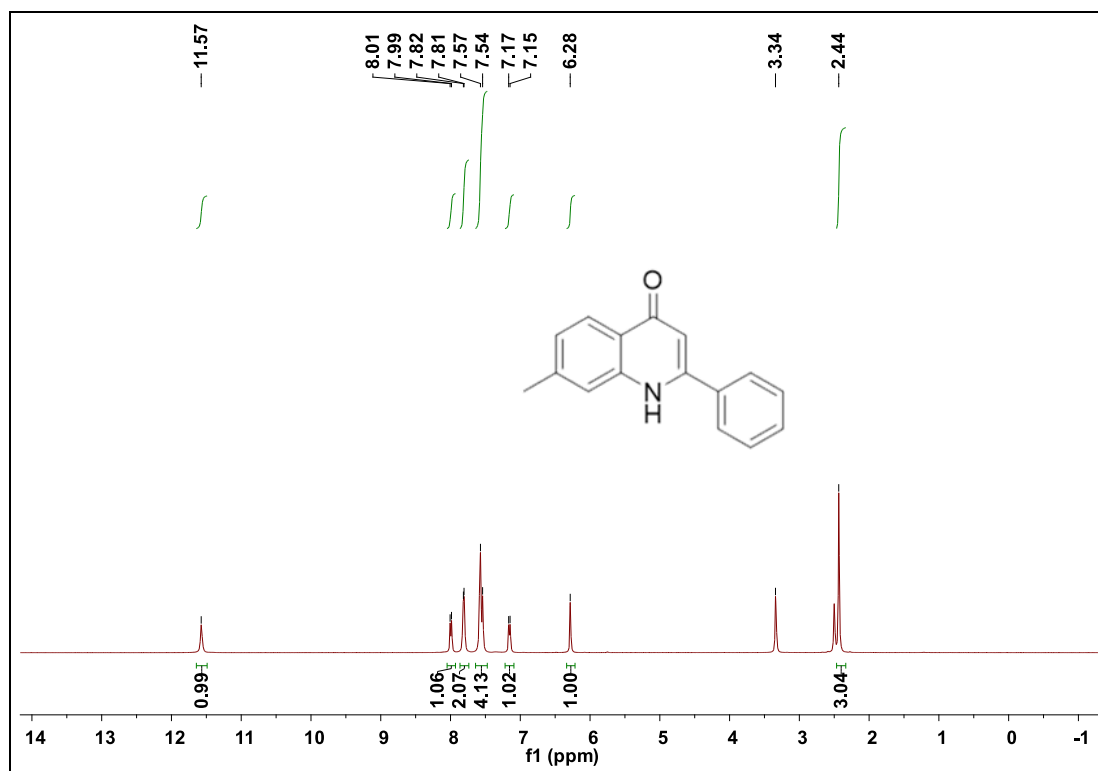

7-methyl-2-phenylquinolin-4(1H)-one (4o)  $^{13}\text{C}$  NMR

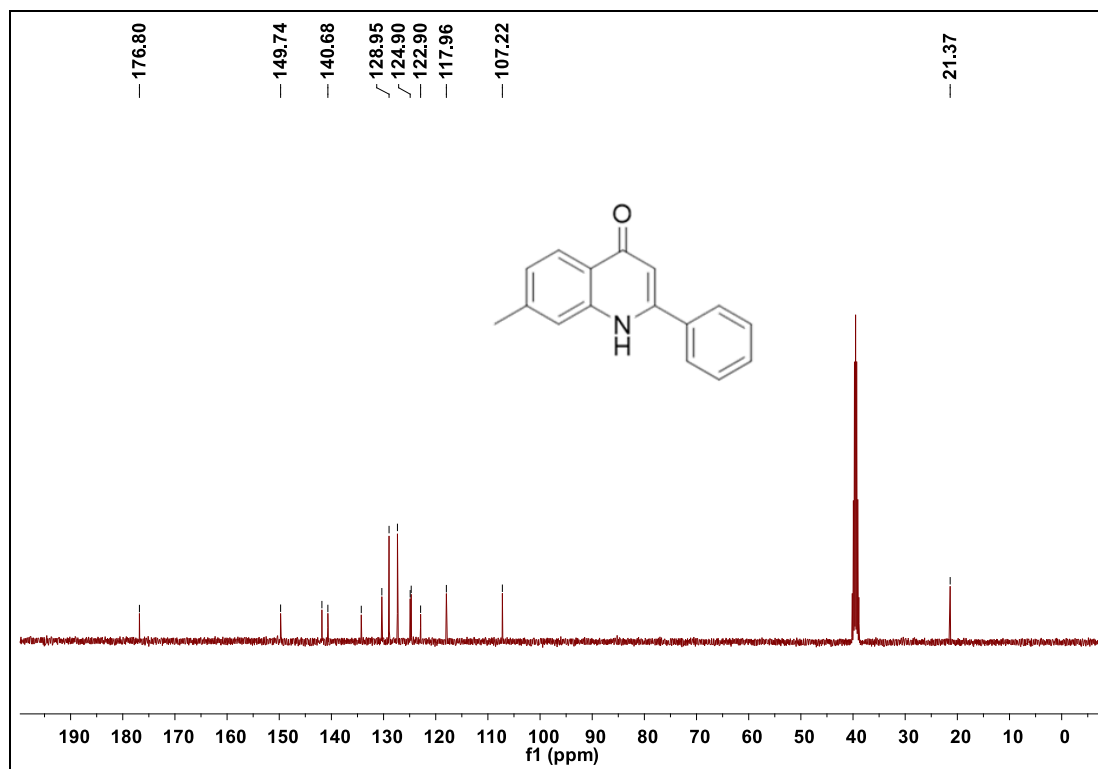

7-methyl-2-(m-methoxyphenyl) quinolin-4(1H)-one (4p)  $^1\text{H}$  NMR

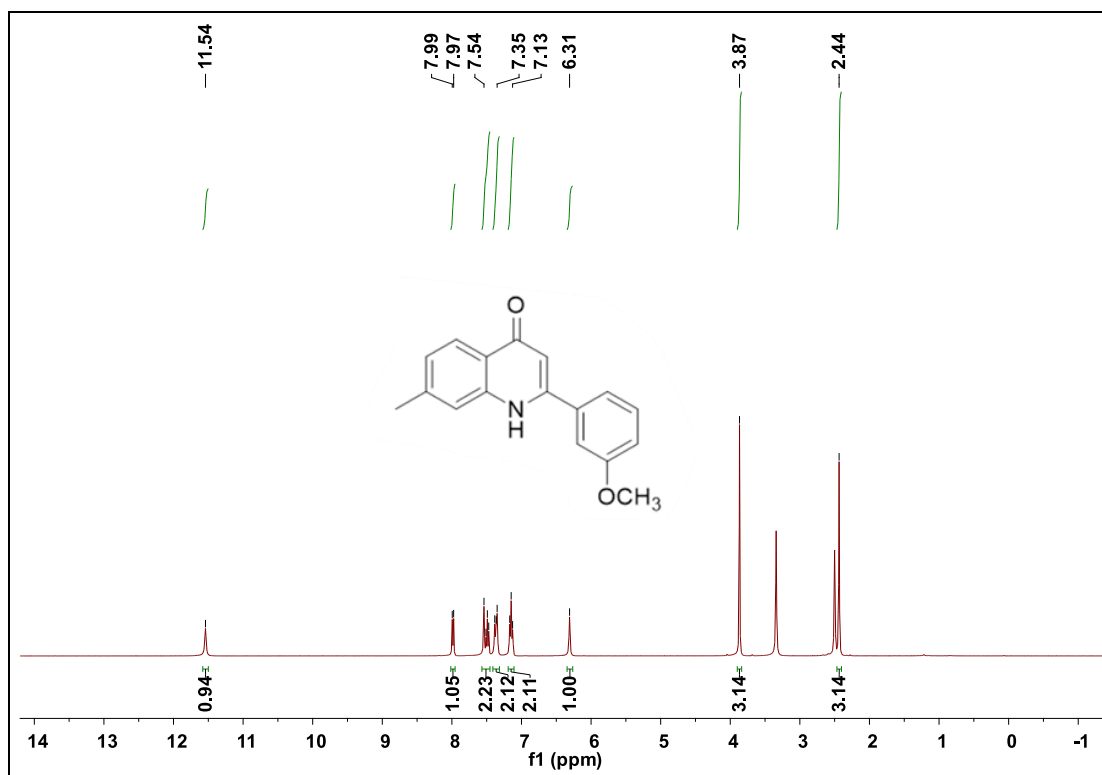

7-methyl-2-(m-methoxyphenyl) quinolin-4(1H)-one (4p)  $^{13}\text{C}$  NMR

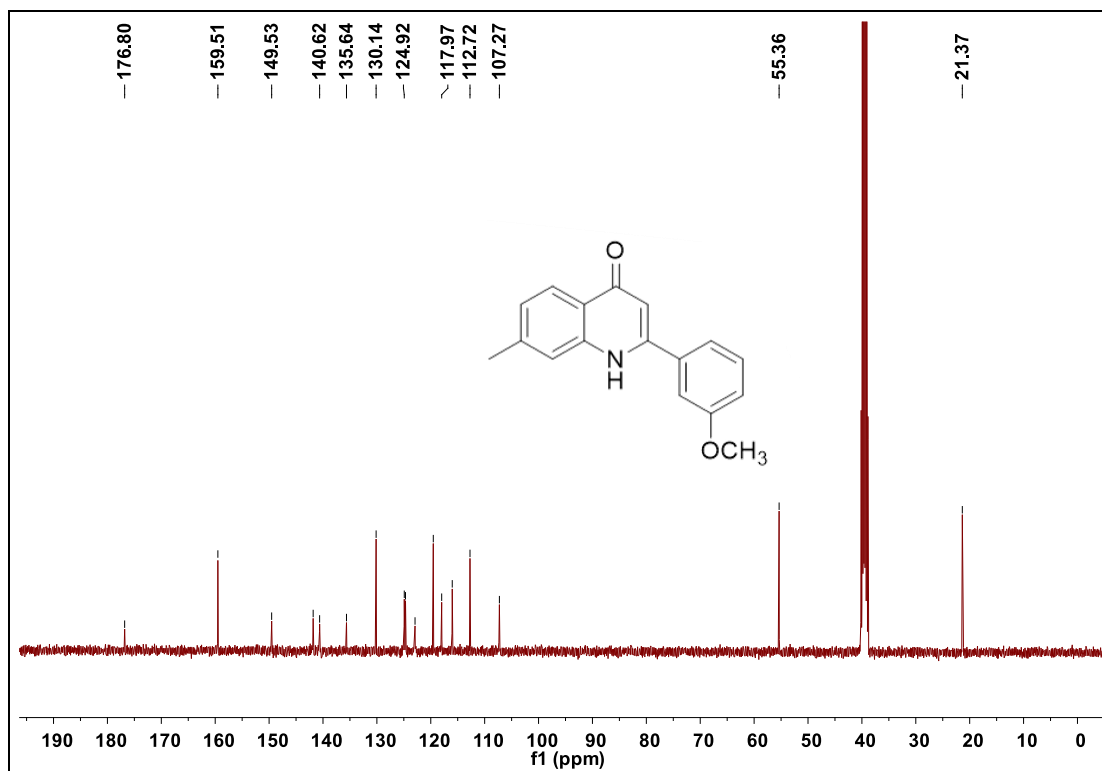

7-methyl-2-(p-methoxyphenyl) quinolin-4(1H)-one (4q)  $^1\text{H}$  NMR

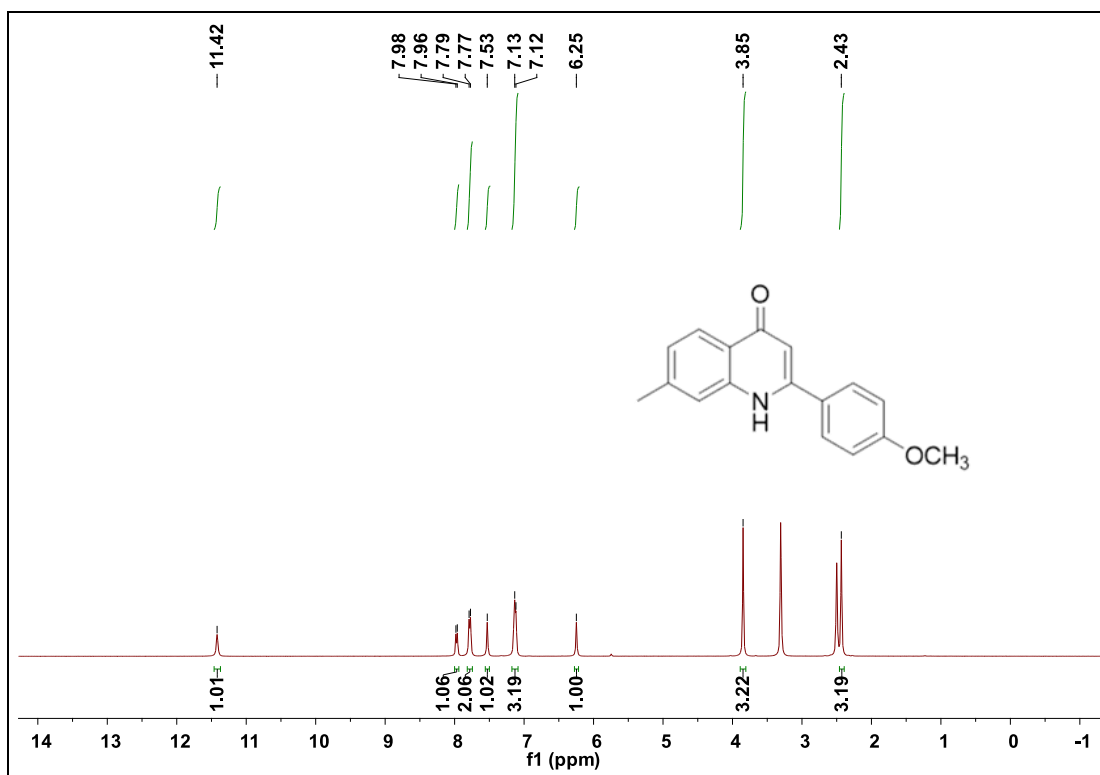

7-methyl-2-(p-methoxyphenyl) quinolin-4(1H)-one (4q)  $^{13}\text{C}$  NMR

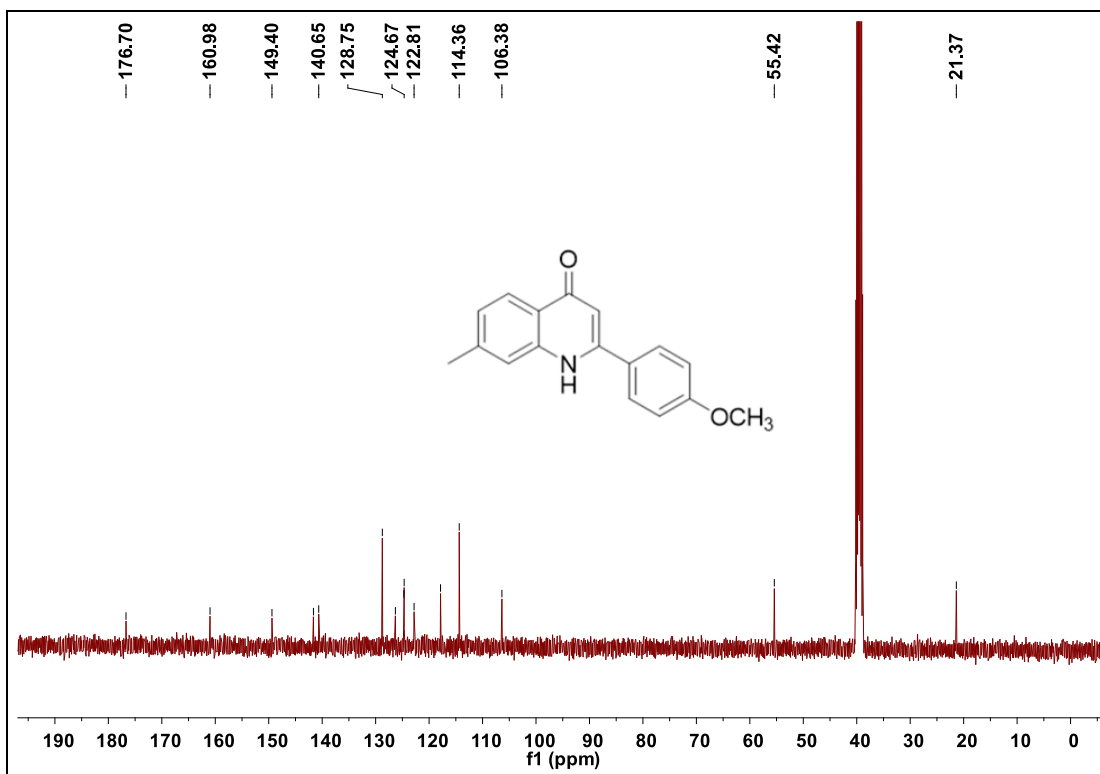

7-methyl-2-(m-tolyl) quinolin-4(1H)-one (4r)  $^1\text{H}$  NMR

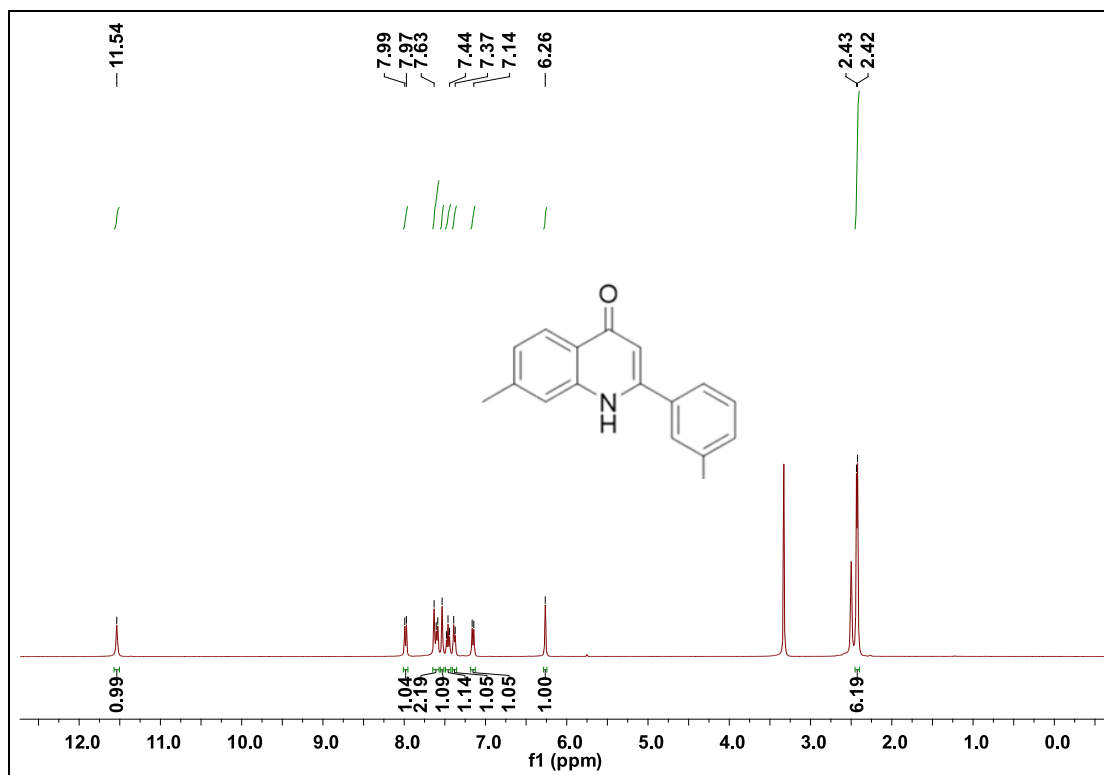

7-methyl-2-(m-tolyl) quinolin-4(1H)-one (4r)  $^{13}\text{C}$  NMR

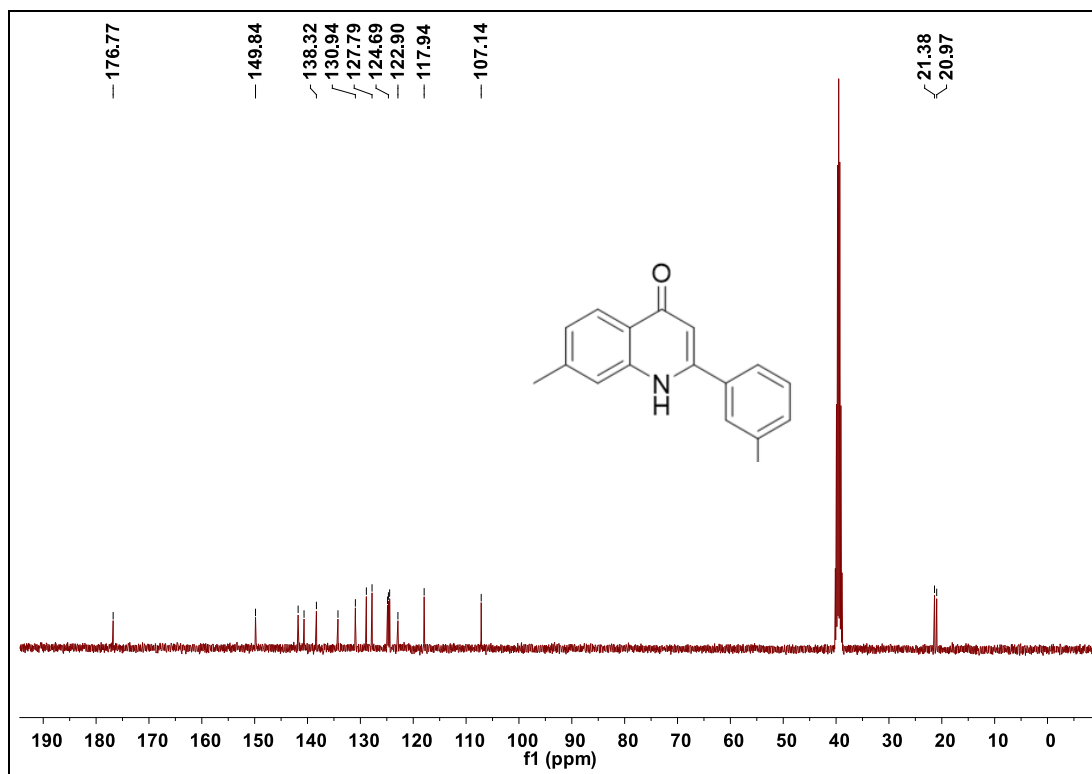

7-methyl-2-(p-tolyl) quinolin-4(1H)-one (4s)  $^1\text{H}$  NMR

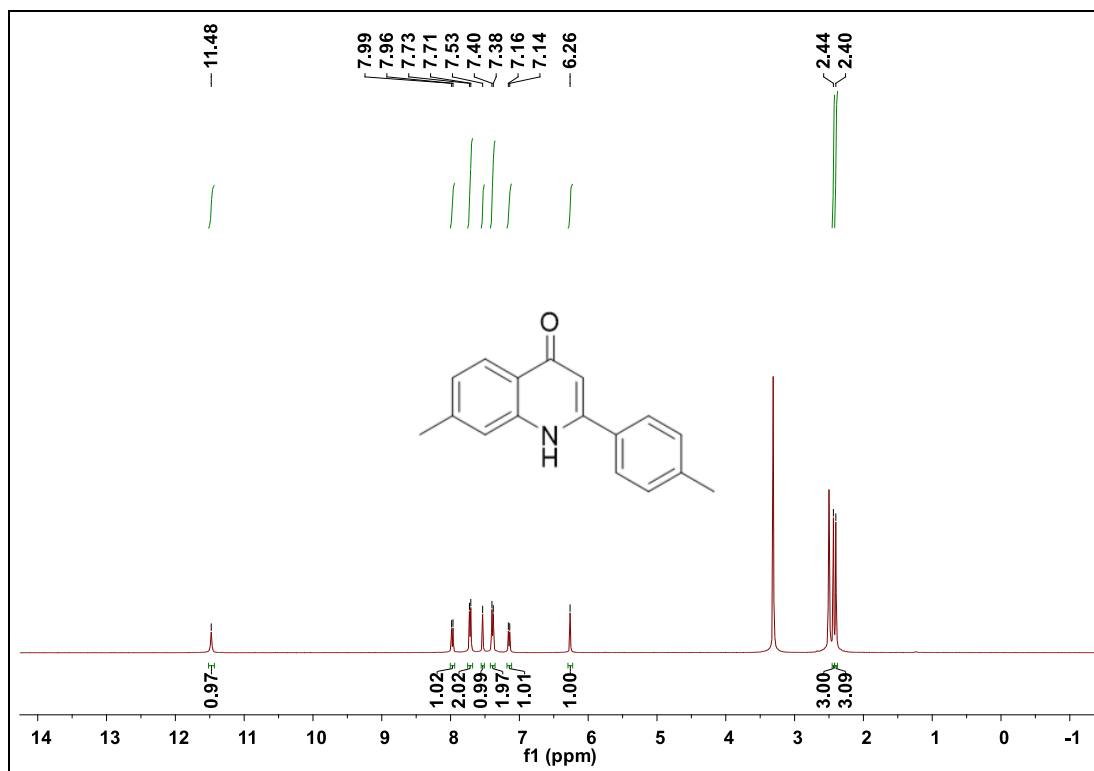

7-methyl-2-(p-tolyl) quinolin-4(1H)-one (4s)  $^{13}\text{C}$  NMR

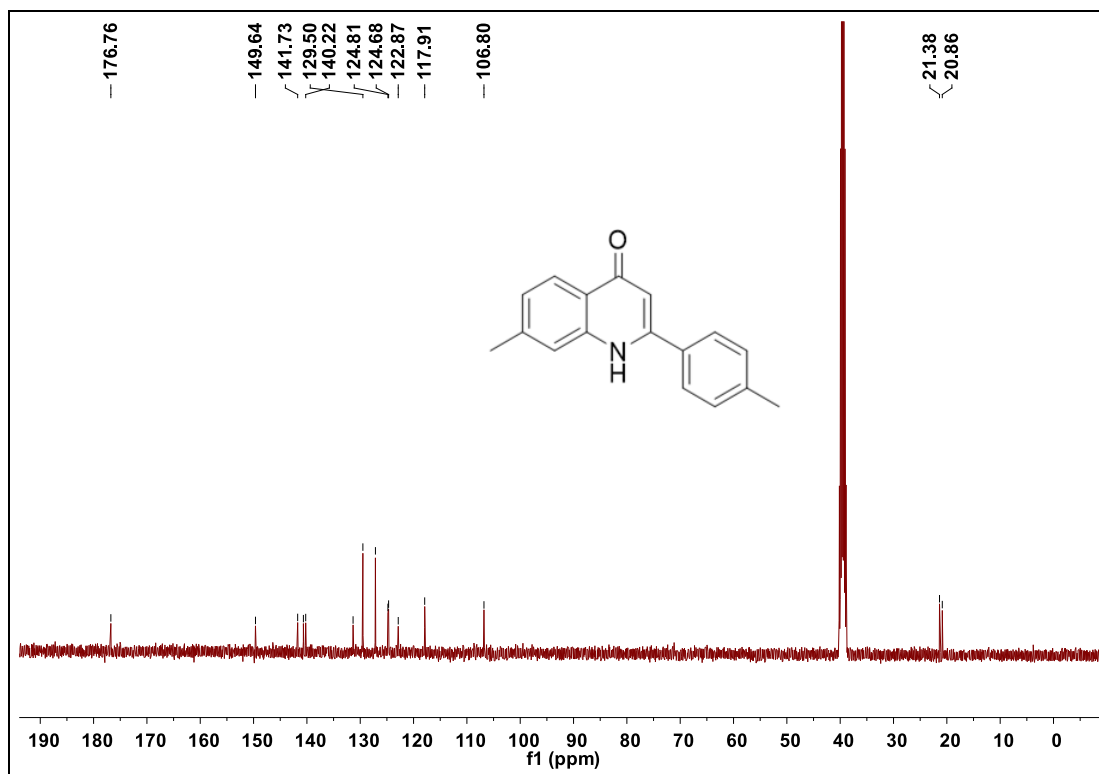

7-methyl-2-(4-butylphenyl) quinolin-4(1H)-one (4t)  $^1\text{H}$  NMR

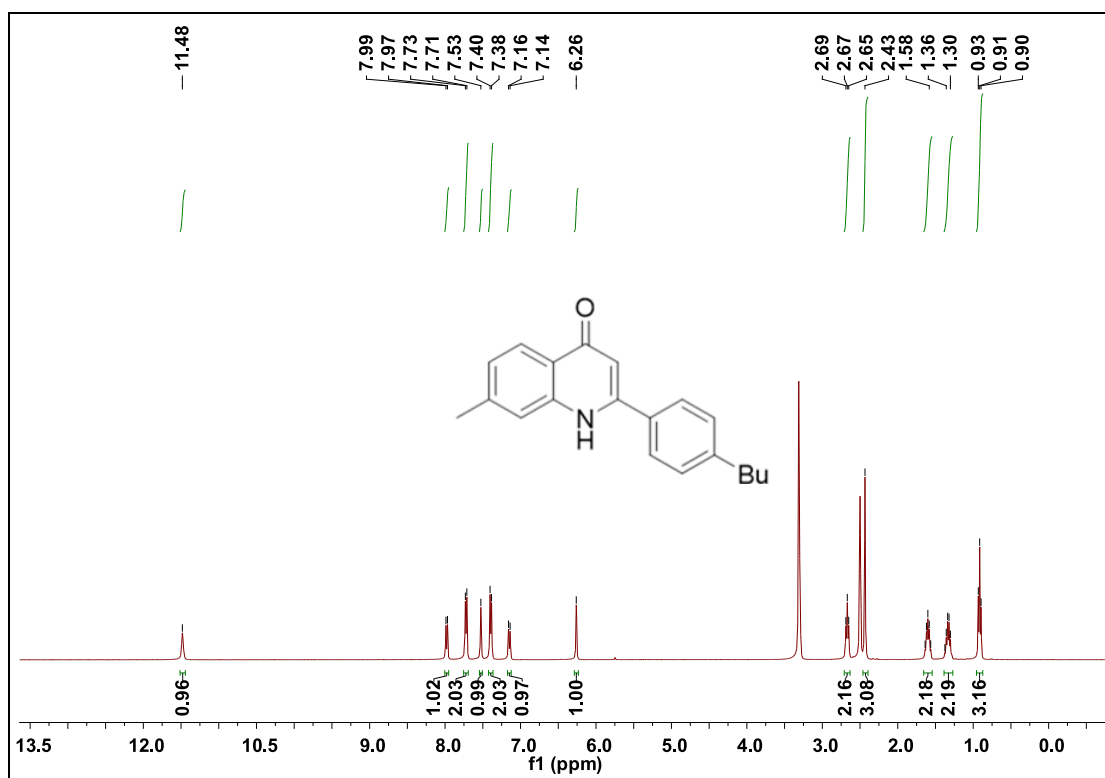

7-methyl-2-(4-butylphenyl) quinolin-4(1H)-one (4t)  $^{13}\text{C}$  NMR

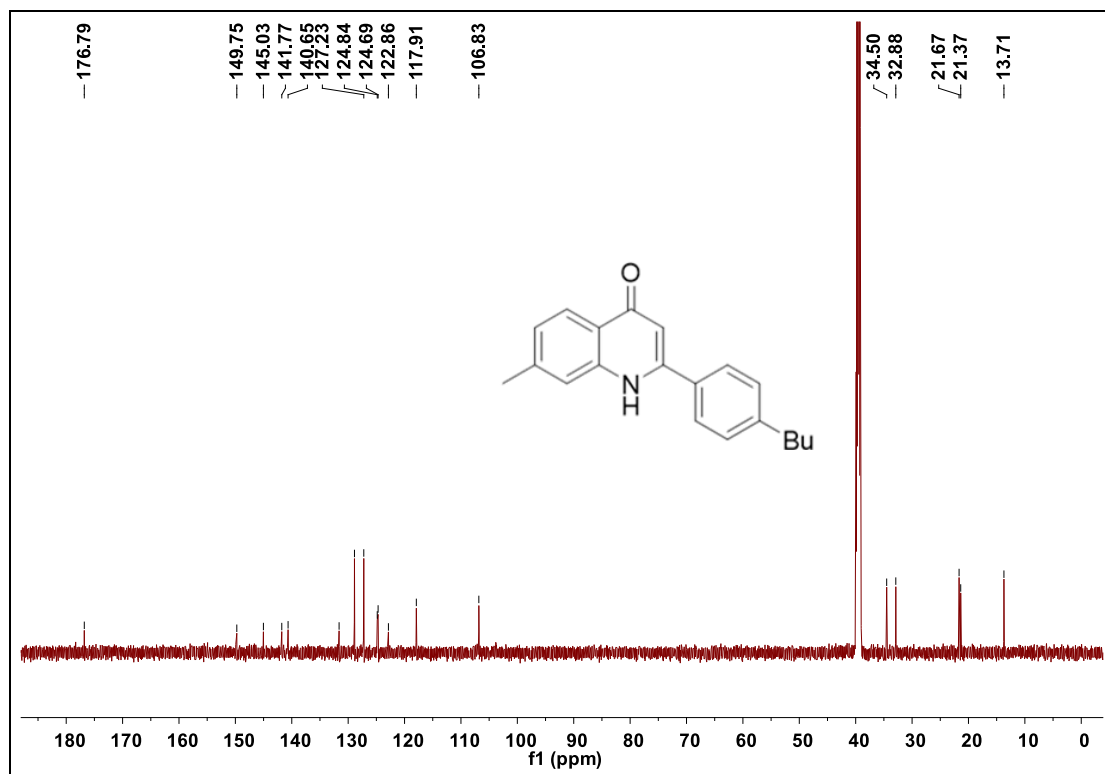

7-methyl-2-(4-(4-oxo-1,4-dihydroquinolin-2-yl)phenyl)acetonitrile (4u) <sup>1</sup>H NMR

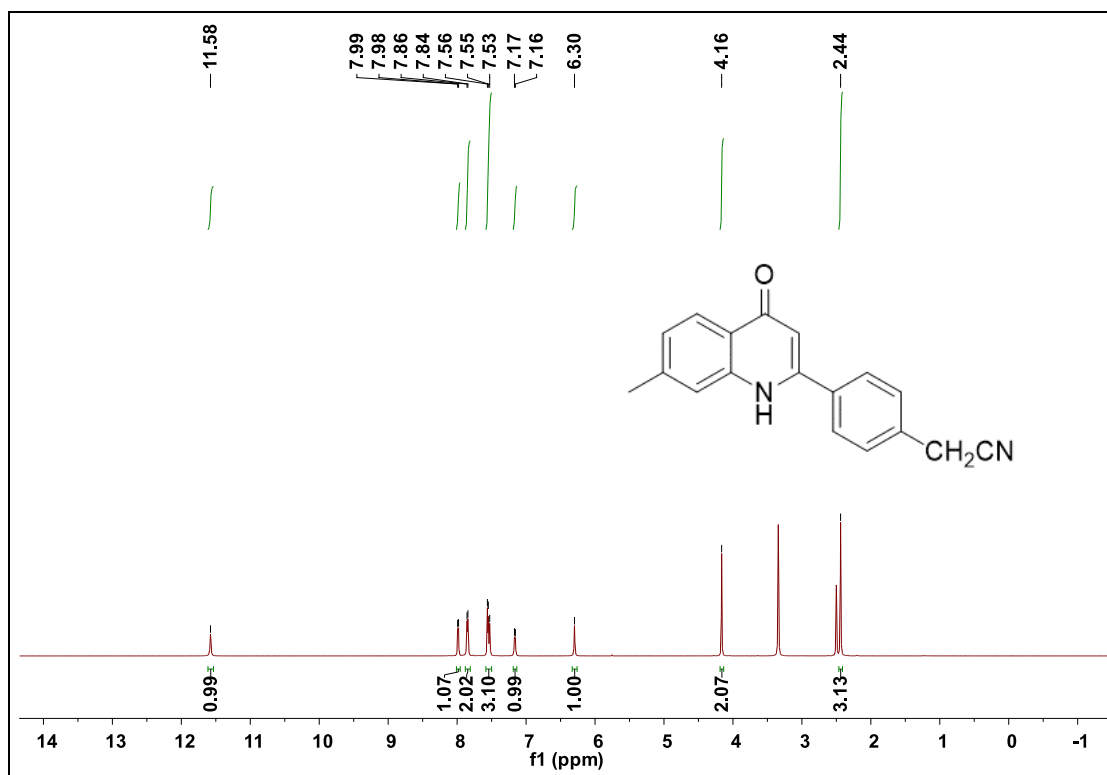

7-methyl-2-(4-(4-oxo-1,4-dihydroquinolin-2-yl)phenyl)acetonitrile (4u) <sup>13</sup>C NMR

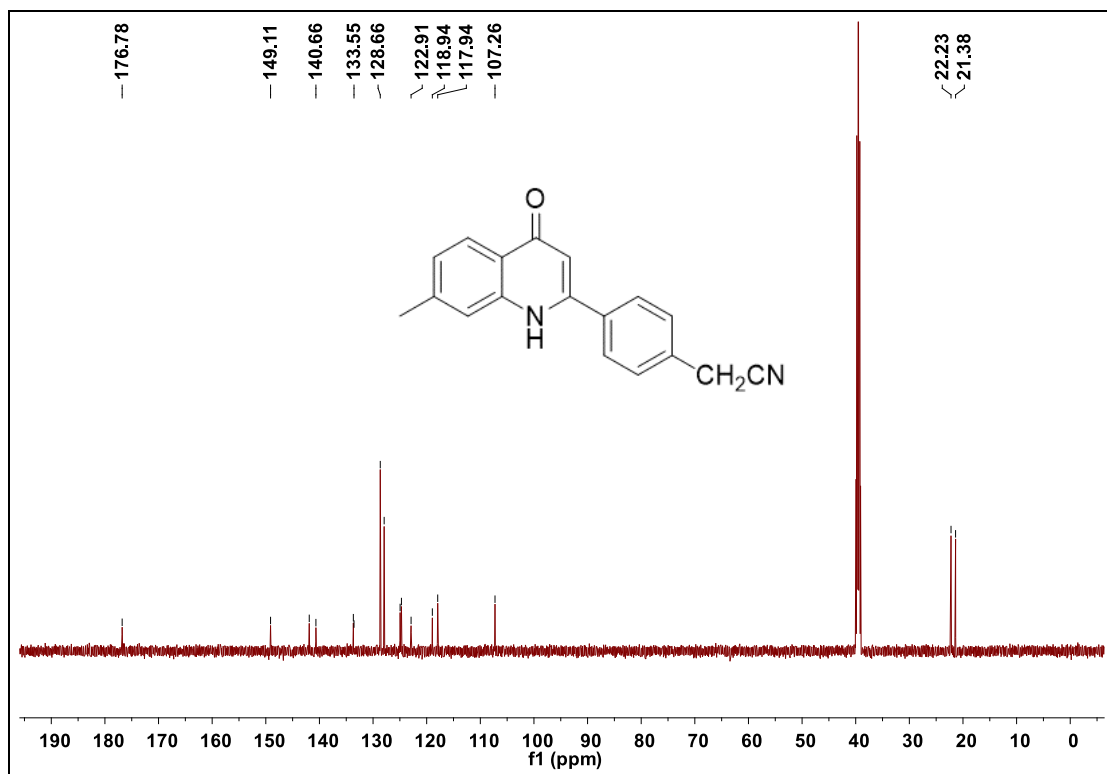

**7-methyl-2-(thiophen-2-yl) quinolin-4(1H)-one (4v)  $^1\text{H}$  NMR**

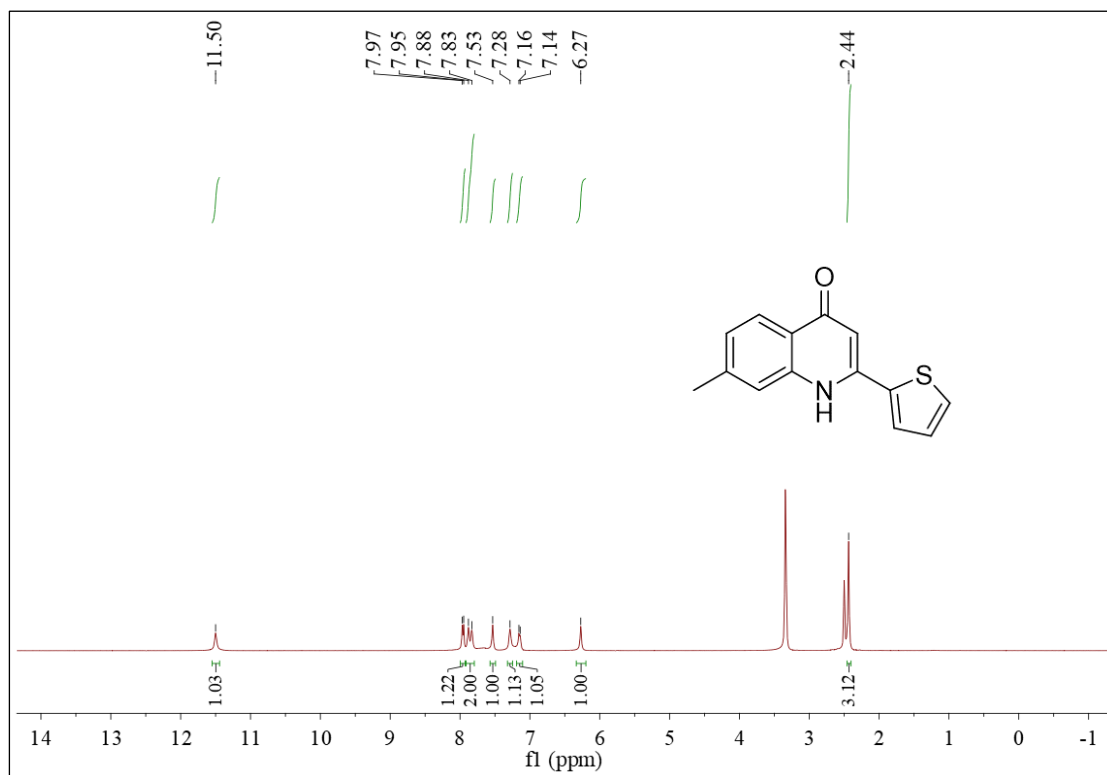

**7-methyl-2-(thiophen-2-yl) quinolin-4(1H)-one (4v)  $^{13}\text{C}$  NMR**

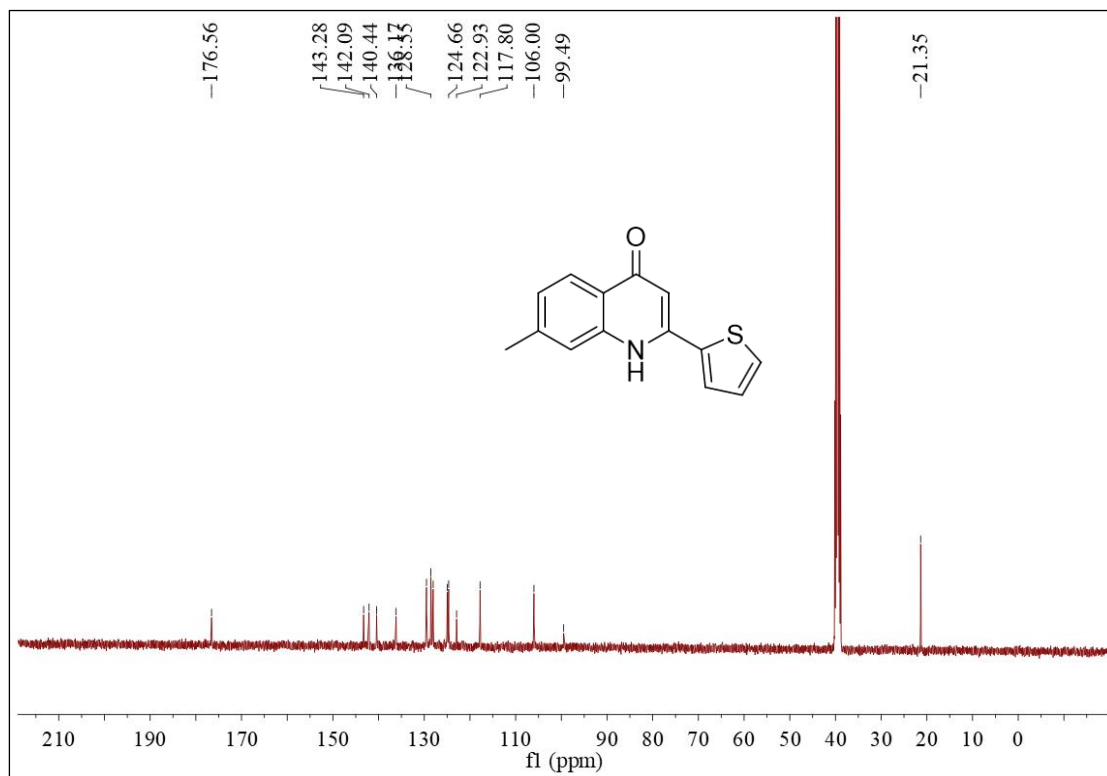



### 3. HRMS Spectra

Palladium complex **VI** or **VII**  $[M+H]^+$

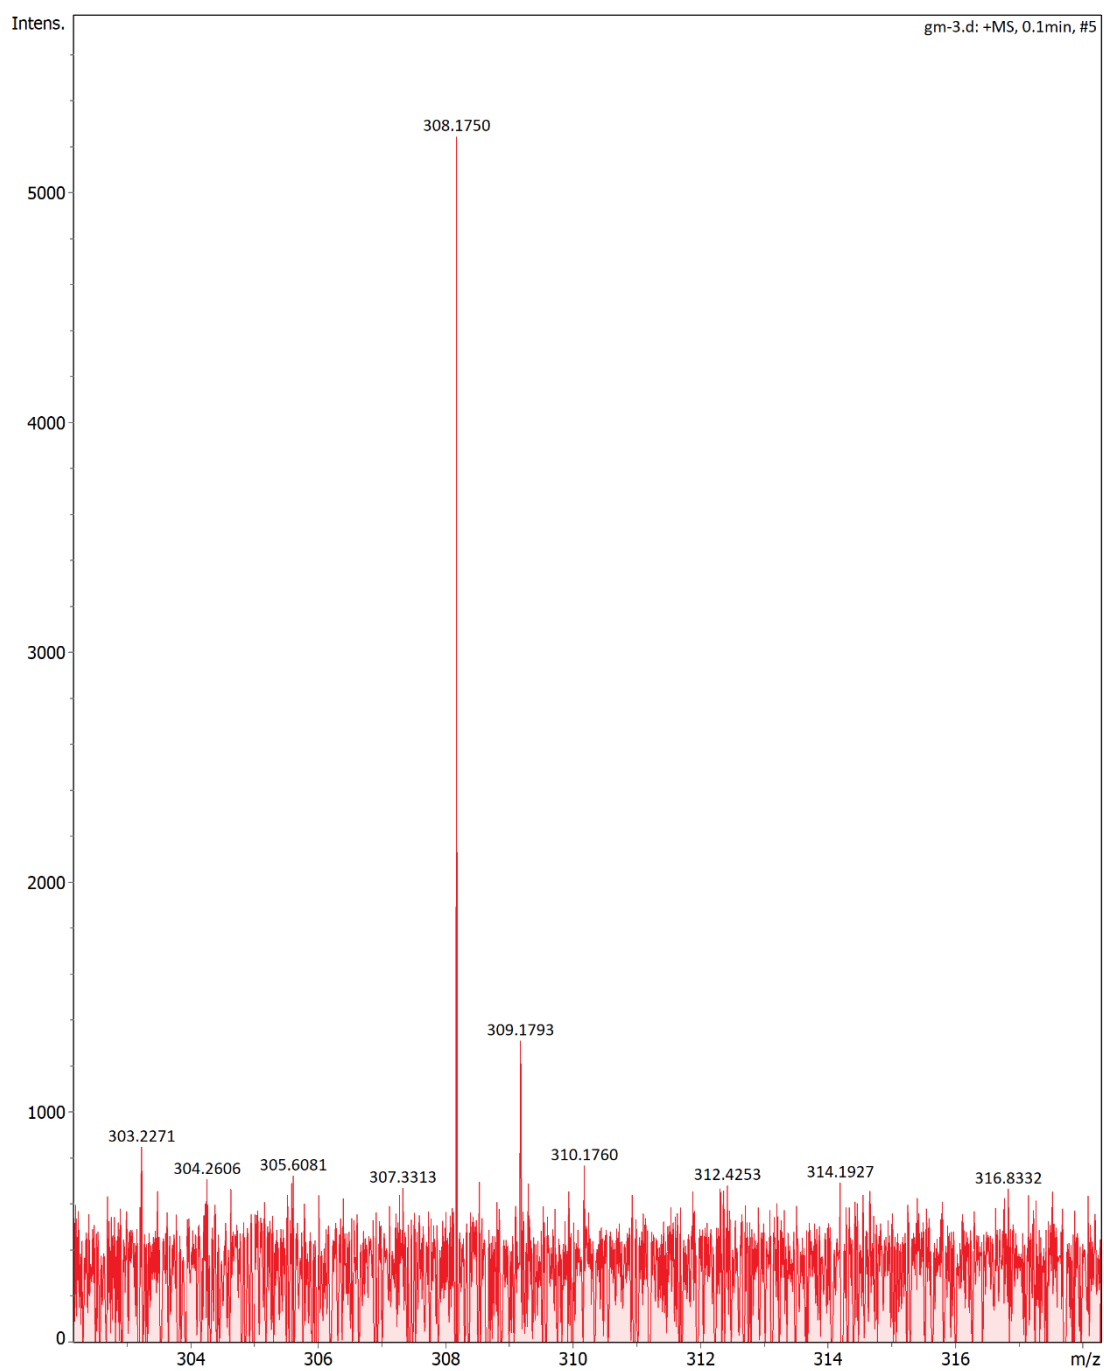

Supplement: s1 [file s1]
